# Supplementary material for: 2-Dimensional rare earth metal–organic frameworks based on a hexanuclear secondary building unit as efficient detectors for vapours of nitroaromatics and volatile organic compounds
Source: Royal Society of Chemistry journal article supplement (doi:10.1039/d2qi00799a), 2022-01-01
Supplement: d2qi00799a1.pdf [file d2qi00799a1.pdf]

## **Electronic Supplementary Information (ESI)**

# **2-Dimensional Rare Earth Metal-Organic Frameworks based on a hexanuclear secondary building unit as efficient detectors for vapours of nitroaromatics and volatile organic compounds**

Nikos Panagiotou<sup>a</sup>, Francisco García Moscoso<sup>b</sup>, Tânia Lopes-Costa<sup>b</sup>, José María Pedrosa<sup>b\*</sup>, Anastasios J. Tasiopoulos<sup>a\*</sup>

<sup>a</sup>Department of Chemistry, University of Cyprus, 1678 Nicosia, Cyprus. E-mail: [atasio@ucy.ac.cy](mailto:atasio@ucy.ac.cy)

<sup>b</sup>Department of Physical, Chemical and Natural Systems, Universidad Pablo de Olavide, 41013 Seville, Spain.

## **Table of Contents**

|                                                                                      |    |
|--------------------------------------------------------------------------------------|----|
| Experimental Part.....                                                               | 3  |
| Physical Measurements/Characterization of UCY-15(RE) (RE: Y, Eu, Gd, Tb, Dy, Ho, Er) | 5  |
| Gas Sorption Measurements .....                                                      | 15 |
| Photoluminescence Studies.....                                                       | 19 |
| Thin film characterisation and sensing studies .....                                 | 21 |
| References .....                                                                     | 34 |

## Experimental Part

### Synthesis of analytes used in sensing studies

#### 2,4,6-Trinitrotoluene

TNT was synthesized by mononitration of DNT with a mixture of concentrated sulfuric and fuming nitric acid in a 5:2 ratio (V/V). The DNT:nitric acid molar *ratio* is calculated to be 1:2. The flask is slowly heated to 110 °C, and the reaction is allowed to occur for 1 h. The mixture is cooled to 80 °C and then distilled water is gently added. The mixture is transferred to a separation funnel, and the upper layer is separated and washed sequentially with distilled water and sodium carbonate solution. The so-obtained solid is recrystallized in an ethanol/toluene (95%, 5%) solution, weighted and purified with sodium sulfite solution with a TNT:sulfite molar ratio of 10:1. A small aliquot is dissolved in ethanol and analyzed with an ion trap spectrometer (HCT, Bruker-Daltonics). The mass (MS) and fragmentation (MS/MS) spectra recorded in positive mode is consistent with the results reported in the literature.<sup>1</sup>

#### Triacetone triperoxide

A 1:1 molar ratio mixture of acetone and aqueous 30% wt hydrogen peroxide was placed in an ice bath to keep the temperature of the mixture at 0-5°C all the time. Under magnetic stirring, 37% wt HCl (1.3 equivalents) was added drop by drop. After 1 hour, a white precipitate had formed. Next, the product was filtered, washed with cold distilled water, and dried in air. Finally, the product was recrystallized in dichloromethane and characterized by mass spectrometry which proved the obtention of the desired product.<sup>2</sup>

**Table S1:** Selected Crystal Data for UCY-15(RE).

| Compound                                      | UCY-15(Y)                                                                         | UCY-15(Eu)                                                                         | UCY-15(Gd)                                                                         | UCY-15(Tb)                                                                         | UCY-15(Dy)                                                                         | UCY-15(Ho)                                                                         |
|-----------------------------------------------|-----------------------------------------------------------------------------------|------------------------------------------------------------------------------------|------------------------------------------------------------------------------------|------------------------------------------------------------------------------------|------------------------------------------------------------------------------------|------------------------------------------------------------------------------------|
| Empirical formula                             | C <sub>28</sub> H <sub>16</sub> NO <sub>22</sub> S <sub>2</sub><br>Y <sub>3</sub> | C <sub>28</sub> H <sub>16</sub> NO <sub>22</sub> S <sub>2</sub><br>Eu <sub>3</sub> | C <sub>28</sub> H <sub>16</sub> NO <sub>22</sub> S <sub>2</sub><br>Gd <sub>3</sub> | C <sub>28</sub> H <sub>16</sub> NO <sub>22</sub> S <sub>2</sub><br>Tb <sub>3</sub> | C <sub>28</sub> H <sub>16</sub> NO <sub>22</sub> S <sub>2</sub><br>Dy <sub>3</sub> | C <sub>28</sub> H <sub>16</sub> NO <sub>22</sub> S <sub>2</sub><br>Ho <sub>3</sub> |
| Formula weight                                | 1049.27                                                                           | 1238.45                                                                            | 1254.29                                                                            | 1259.3                                                                             | 1270.04                                                                            | 1277.33                                                                            |
| Temperature / K                               | 104(2)                                                                            | 105(4)                                                                             | 102.8(9)                                                                           | 103.8(9)                                                                           | 103.8(8)                                                                           | 105(1)                                                                             |
| Wavelength / Å                                | 1.54184                                                                           | 1.54184                                                                            | 1.54184                                                                            | 1.54184                                                                            | 1.54184                                                                            | 1.54184                                                                            |
| Crystal system                                | Monoclinic                                                                        | Monoclinic                                                                         | Monoclinic                                                                         | Monoclinic                                                                         | Monoclinic                                                                         | Monoclinic                                                                         |
| Space group                                   | <i>C</i> 2/ <i>m</i>                                                              | <i>C</i> 2/ <i>m</i>                                                               | <i>C</i> 2/ <i>m</i>                                                               | <i>C</i> 2/ <i>m</i>                                                               | <i>C</i> 2/ <i>m</i>                                                               | <i>C</i> 2/ <i>m</i>                                                               |
| <i>a</i> / Å                                  | 29.232(8)                                                                         | 29.457(2)                                                                          | 29.272(2)                                                                          | 29.298(6)                                                                          | 29.243(1)                                                                          | 29.360(9)                                                                          |
| <i>b</i> / Å                                  | 18.441(8)                                                                         | 18.607(8)                                                                          | 18.611(1)                                                                          | 18.510(4)                                                                          | 18.498(1)                                                                          | 18.475(6)                                                                          |
| <i>c</i> / Å                                  | 14.630(4)                                                                         | 14.691(1)                                                                          | 14.579(6)                                                                          | 14.423(3)                                                                          | 14.460(3)                                                                          | 14.691(6)                                                                          |
| $\alpha = \gamma / ^\circ$                    | 90                                                                                | 90                                                                                 | 90                                                                                 | 90                                                                                 | 90                                                                                 | 90                                                                                 |
| $\beta / ^\circ$                              | 104.3(3)                                                                          | 103.8(5)                                                                           | 103.9(5)                                                                           | 103.5(2)                                                                           | 103.8(2)                                                                           | 104.3(3)                                                                           |
| Volume / Å <sup>3</sup>                       | 7642.3(5)                                                                         | 7819.7(8)                                                                          | 7708.8(7)                                                                          | 7605.3(3)                                                                          | 7598.0(3)                                                                          | 7721.7(4)                                                                          |
| <i>Z</i>                                      | 4                                                                                 | 4                                                                                  | 4                                                                                  | 4                                                                                  | 4                                                                                  | 4                                                                                  |
| <i>d</i> <sub>calc.</sub> / g/cm <sup>3</sup> | 0.912                                                                             | 1.054                                                                              | 1.078                                                                              | 1.1                                                                                | 1.11                                                                               | 1.099                                                                              |
| Absorption coefficient / mm <sup>-1</sup>     | 3.885                                                                             | 17.869                                                                             | 17.333                                                                             | 14.381                                                                             | 16.448                                                                             | 6.394                                                                              |
| F(000)                                        | 2064                                                                              | 2352                                                                               | 2364                                                                               | 2376                                                                               | 2388                                                                               | 2400                                                                               |
| Reflections collected                         | 14335                                                                             | 14902                                                                              | 17267                                                                              | 15142                                                                              | 14568                                                                              | 23966                                                                              |
| Independent reflections                       | 6989                                                                              | 7205                                                                               | 7786                                                                               | 7006                                                                               | 7010                                                                               | 7092                                                                               |
| Completeness to $\theta = 66.999^\circ$       | 99.20%<br>[R(int) = 0.0594]                                                       | 99.80%<br>[R(int) = 0.0559]                                                        | 99.80%<br>[R(int) = 0.0741]                                                        | 99.90%<br>[R(int) = 0.0344]                                                        | 99.80%<br>[R(int) = 0.0403]                                                        | 99.50%<br>[R(int) = 0.0416]                                                        |
| Data / restraints / parameters                | 6989 / 16 / 262                                                                   | 7205 / 16 / 262                                                                    | 7786 / 16 / 262                                                                    | 7006 / 25 / 262                                                                    | 6997 / 22 / 262                                                                    | 7092 / 1 / 262                                                                     |
| Goodness-of-fit                               | 1.068                                                                             | 0.98                                                                               | 1.039                                                                              | 1.01                                                                               | 1.027                                                                              | 1.083                                                                              |
| Final R indices [I > 2 $\sigma$ (I)]          | R <sub>obs.</sub> = 0.0849, wR <sub>obs.</sub> = 0.2560                           | R <sub>obs.</sub> = 0.0680, wR <sub>obs.</sub> = 0.1867                            | R <sub>obs.</sub> = 0.0845, wR <sub>obs.</sub> = 0.2423                            | R <sub>obs.</sub> = 0.0479, wR <sub>obs.</sub> = 0.1359                            | R <sub>obs.</sub> = 0.0513, wR <sub>obs.</sub> = 0.1467                            | R <sub>obs.</sub> = 0.0588, wR <sub>obs.</sub> = 0.1792                            |
| R indices [all data]                          | R <sub>all</sub> = 0.1199, wR <sub>all</sub> = 0.2814                             | R <sub>all</sub> = 0.0790, wR <sub>all</sub> = 0.1951                              | R <sub>all</sub> = 0.1119, wR <sub>all</sub> = 0.2833                              | R <sub>all</sub> = 0.0565, wR <sub>all</sub> = 0.1402                              | R <sub>all</sub> = 0.0583, wR <sub>all</sub> = 0.1517                              | R <sub>all</sub> = 0.0655, wR <sub>all</sub> = 0.1893                              |

<sup>a</sup>R =  $\sum(|F_o| - |F_c|) / \sum|F_o|$ , wR =  $\{\sum[w(|F_o|^2 - |F_c|^2)^2] / \sum[w(|F_o|^4)]\}^{1/2}$  and  
<sup>b</sup>w =  $1/[\sigma^2(F_o^2) + (mP)^2 + nP]$  where  $P = (F_o^2 + 2F_c^2)/3$  and m and n are constants

**Physical Measurements/Characterization of UCY-15(RE) (RE: Y, Eu, Gd, Tb, Dy, Ho, Er)**

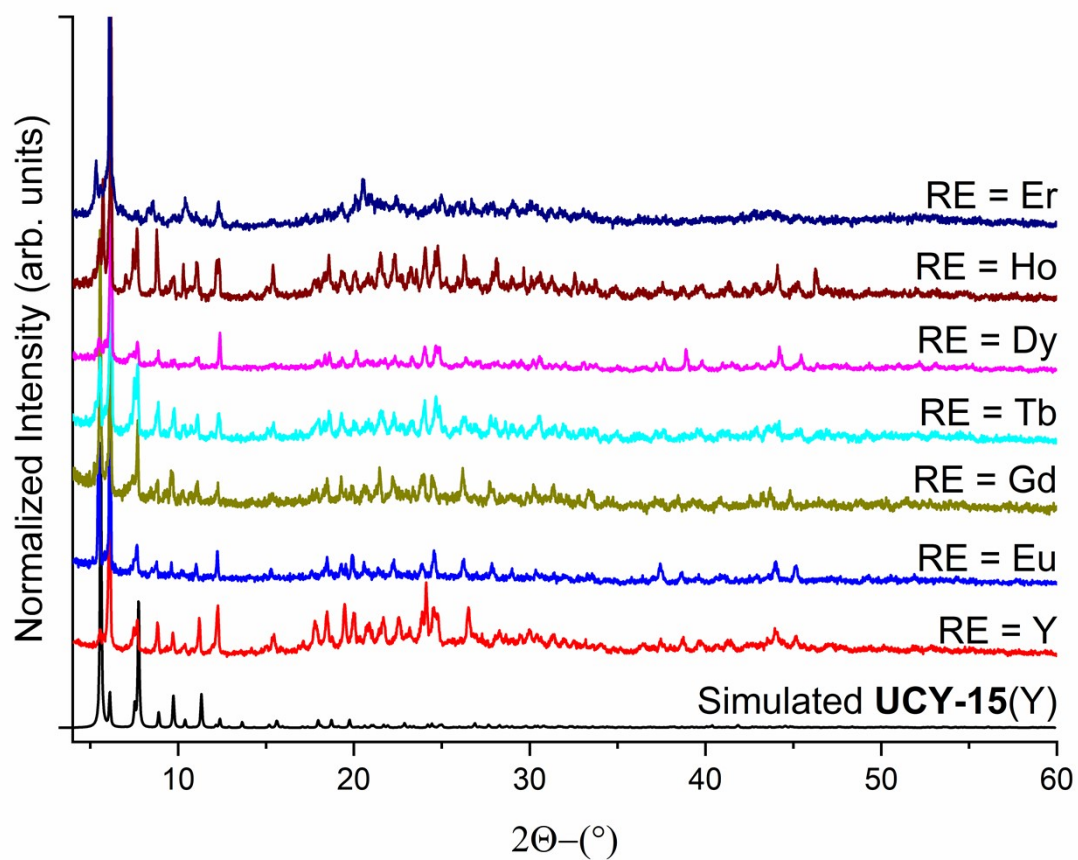

**Figure S1:** Powder X-ray diffraction pattern of the as synthesized compounds UCY-15(RE), along with the simulated pattern of UCY-15(Y) from the single crystal data.

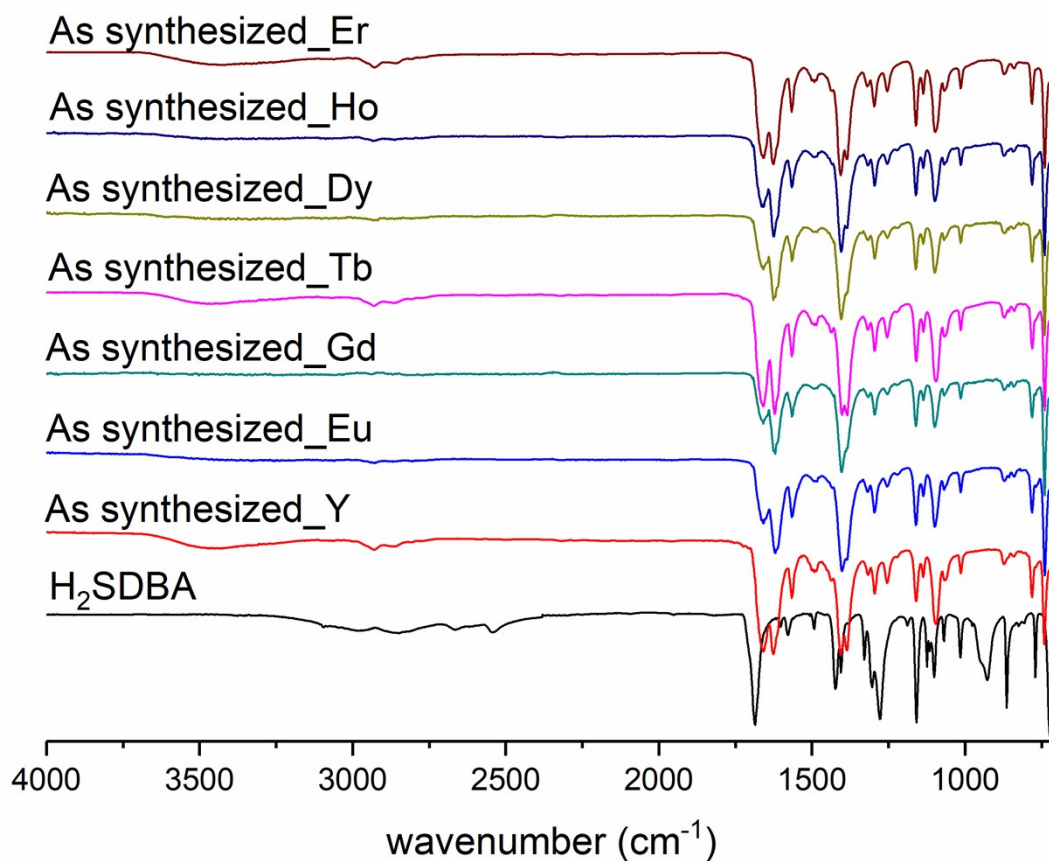

**Figure S2:** IR spectra of H<sub>2</sub>SDBA and the as synthesized compounds UCY-15(RE).

| Functional Group                     | IR frequency (cm <sup>-1</sup> ) |            |
|--------------------------------------|----------------------------------|------------|
|                                      | H <sub>2</sub> SDBA              | UCY-15(RE) |
| v(O-H), H <sub>2</sub> O             | -                                | ~3400      |
| v(=C-H)-p                            | 3099, 864                        | 866        |
| v(-CH <sub>3</sub> DMF)              | -                                | 2927, 2852 |
| v(C=O, DMF)                          | -                                | 1660       |
| v(C=O) <sub>ant</sub>                | 1685                             | 1630       |
| v(C=O) <sub>sym</sub>                | -                                | 1406       |
| v(N-O), NO <sub>3</sub> <sup>-</sup> | -                                | 1384       |
| v(S=O) <sub>ant</sub>                | 1278                             | 1296       |
| v(S=O) <sub>sym</sub>                | 1159                             | 1161       |

**Table S2:** IR peaks assignment.

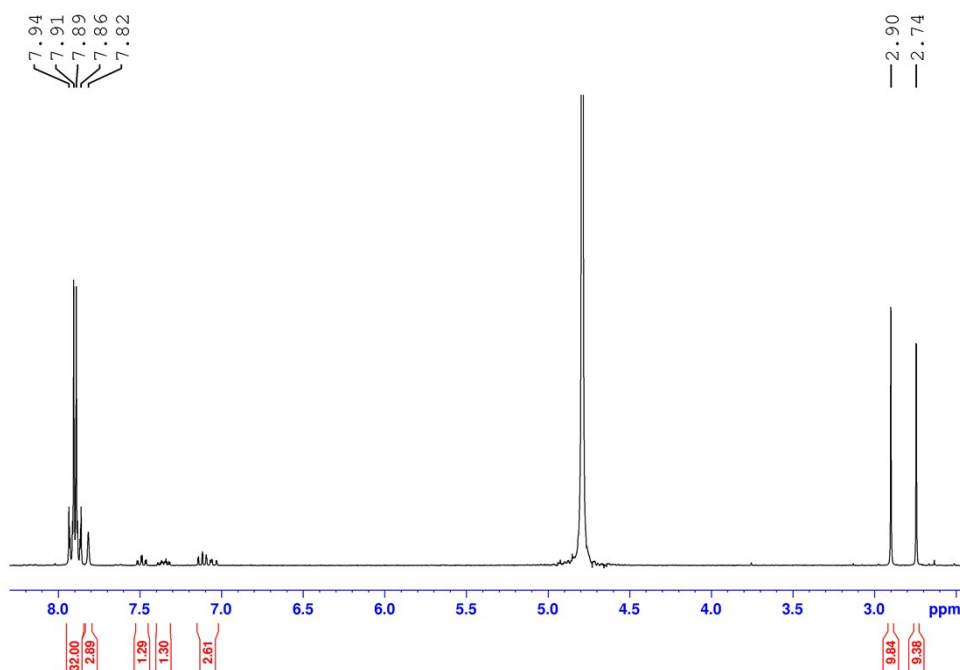

**Figure S3:**  $^1\text{H}$ -NMR spectrum of as synthesized **UCY-15(Y)** digested in 0.5M KOH in  $\text{D}_2\text{O}$ . These data indicate the presence of the organic ligand  $\text{SDBA}^{2-}$  as well as HFBA and DMF molecules in **UCY-15(Y)**.  $^1\text{H}$  NMR ( $\text{D}_2\text{O}$ ):  $\delta$  4.79 (s, residual solvent peaks),  $\delta$  2.74 (s, 3H,  $\text{CH}_3$ , DMF),  $\delta$  2.9 (s, 3H,  $\text{CH}_3$ , DMF),  $\delta$  7.82 (s, H,  $\text{CHO}$ , DMF),  $\delta$  7.05-7.51 (m, 4H, Ar-H,  $\text{FBA}^-$ ),  $\delta$  7.86-7.89 (d, 4H, Ar-H,  $\text{SDBA}^{2-}$ ),  $\delta$  7.91 – 7.94 (d, 4H, Ar-H,  $\text{SDBA}^{2-}$ ).

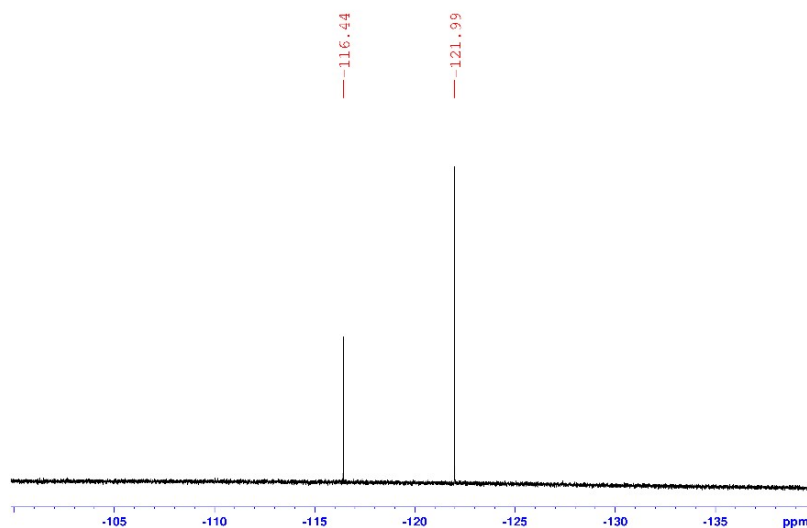

**Figure S4:**  $^{19}\text{F}$ -NMR spectrum of as synthesized **UCY-15(Y)** digested in 0.5M KOH in  $\text{D}_2\text{O}$ . These data indicate the presence of the modulator HFBA and  $\text{F}^-$  anions in **UCY-15(Y)**.  $^{19}\text{F}$  NMR ( $\text{D}_2\text{O}$ ):  $\delta$  -116.44 (HFBA),  $\delta$  -121.99 ( $\text{F}^-$ ).<sup>3,4</sup>

**Determination of the amount of F<sup>-</sup> anions per (Y<sup>3+</sup>)<sub>6</sub> SBU in bulk UCY-15(Y) microcrystalline powder:** In order to quantify the amount of F<sup>-</sup> anions per (Re<sup>3+</sup>)<sub>6</sub> SBU <sup>19</sup>Fq-NMR measurements were performed. For this purpose, a trifluoroacetic acid (TFA) solution in D<sub>2</sub>O was used as an external standard. Prior the <sup>19</sup>Fq-NMR experiment, the concentration of the trifluoroacetic acid (TFA) solution was determined using NaF solutions with known concentration. Afterwards microcrystalline powder of UCY-15(Y) (~ 10 – 15mg in each experiment) was digested in a 0.5M KOH solution and then 500 μL of the resulting solution was transferred to the NMR tube along with the microprobe tube containing the external standard (the known concentration trifluoroacetic acid (TFA) solution). The experiment was repeated three times.<sup>5</sup>

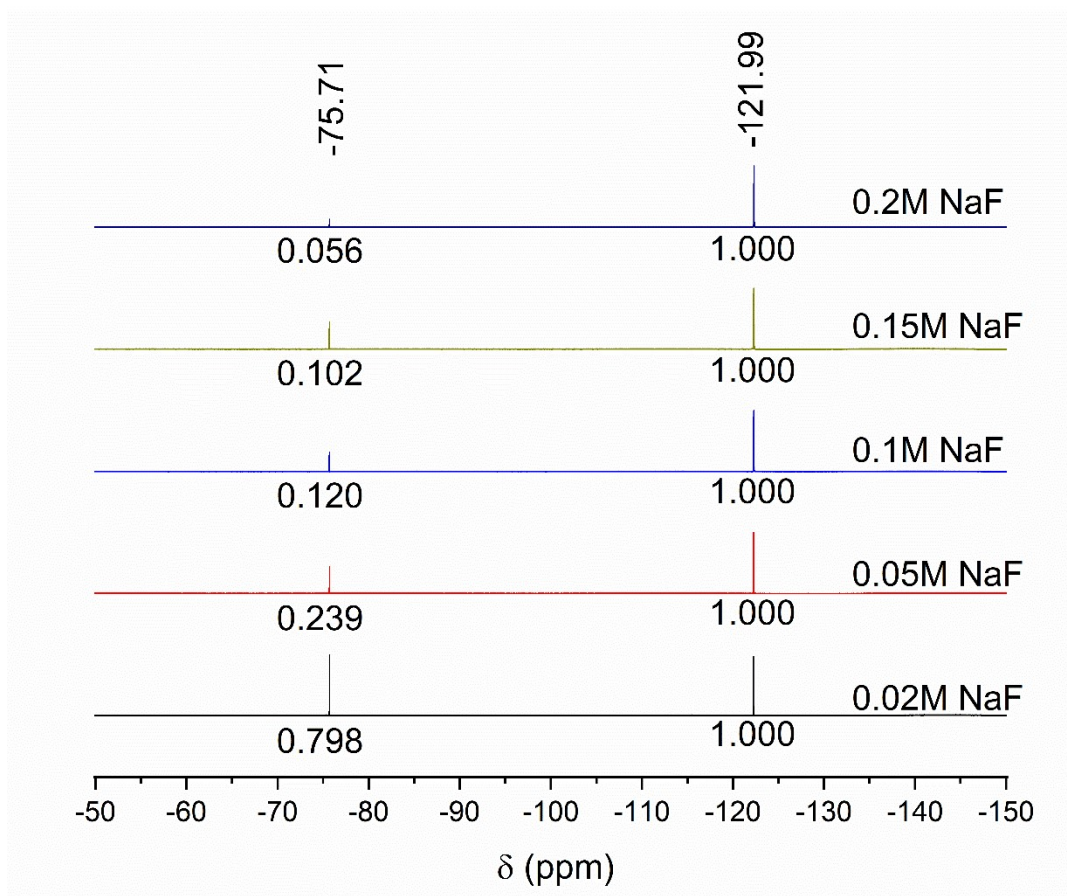

**Figure S5:** <sup>19</sup>Fq-NMR calibration spectra of the TFA solution external standard using NaF solutions of known concentration. TFA concentration was found equal to  $4.4 \pm 0.6$  mM. <sup>19</sup>F NMR (D<sub>2</sub>O):  $\delta$  -75.71 (TFA),  $\delta$  -121.99 (F<sup>-</sup>).



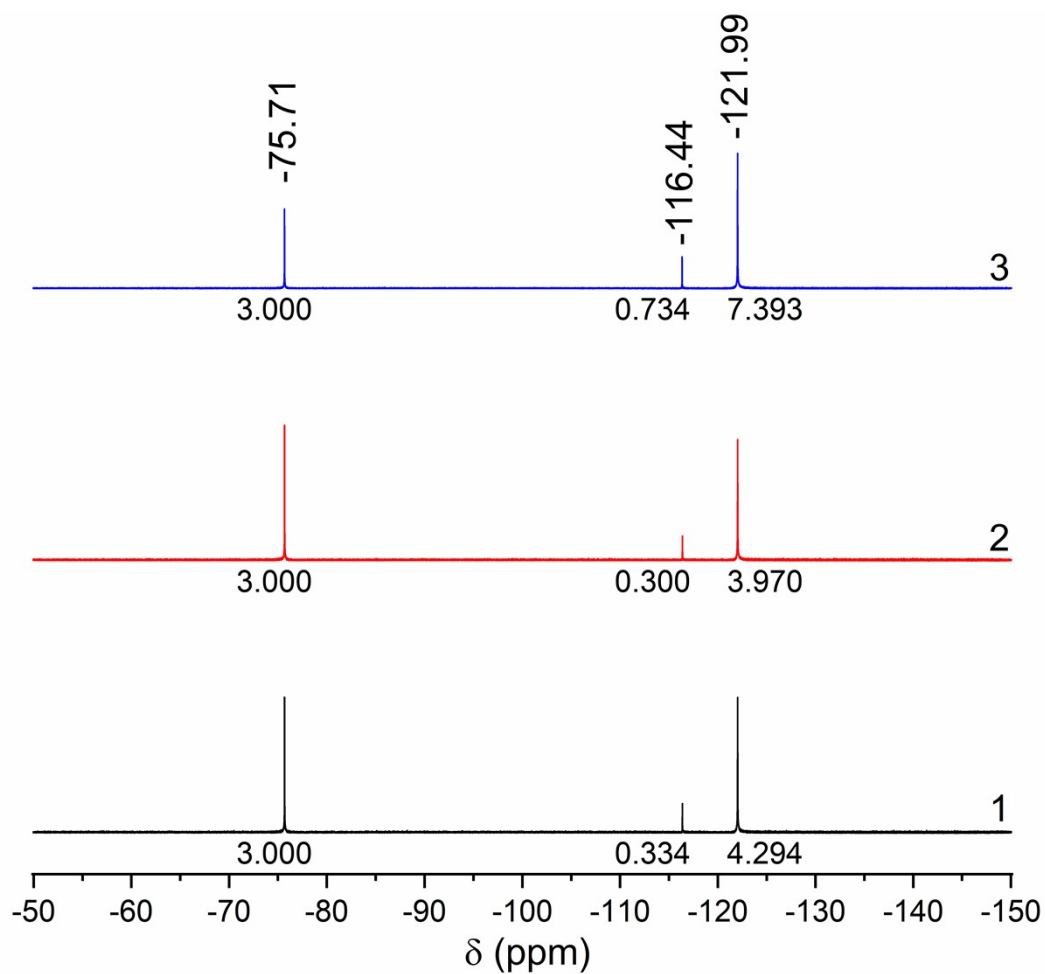

**Figure S6:**  $^{19}\text{F}$ q-NMR spectra of as synthesized UCY-15(Y) digested in 0.5M KOH in  $\text{D}_2\text{O}$  along with the TFA solution external standard. These studies indicated that UCY-15(Y) contains  $\sim 2.9 \pm 0.4 \text{ F}^- \text{ anions} / (\text{Y}^{3+})_6 \text{ SBU}$ . Moreover, the quantity of the trapped HFBA molecules was found to be  $\sim 0.29 \pm 0.04 \text{ HFBA} / (\text{Y}^{3+})_6 \text{ SBU}$ .  $^{19}\text{F}$  NMR ( $\text{D}_2\text{O}$ ):  $\delta$  -75.71 (TFA),  $\delta$  -116.44 ( $\text{FBA}^-$ ),  $\delta$  -121.99 ( $\text{F}^-$ ).

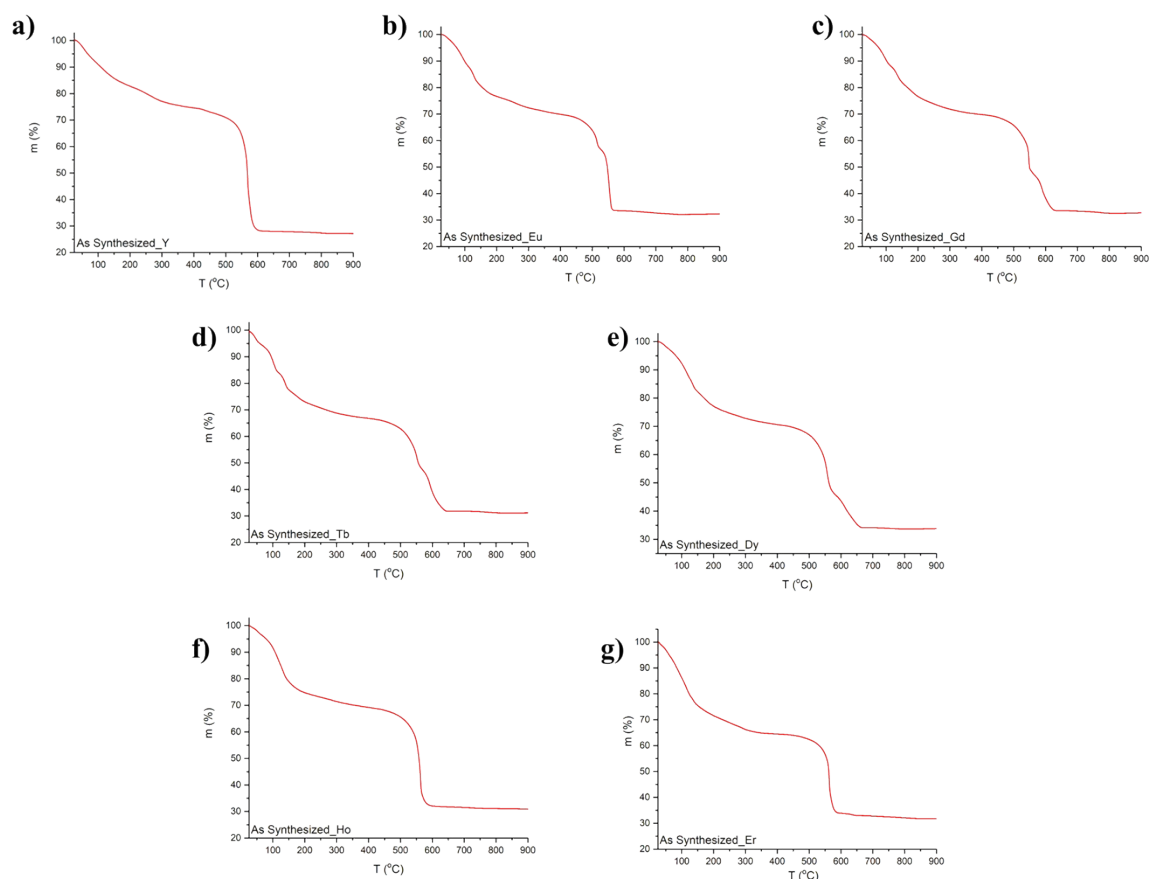

**Figure S7:** TGA graphs of the as synthesized compounds **UCY-15(RE)** ((a) RE = Y, (b) RE = Eu, (c) RE = Gd, (d) RE = Tb, (e) RE = Dy, (f) RE = Ho, (g) RE = Er). TG analysis reveals that the thermal decomposition of compounds **UCY-15(RE)** proceeds via a two-step process. The first step (until  $\sim 460\text{-}480^\circ\text{C}$ ) is attributed to the removal of the terminal water molecules and lattice DMF molecules. The second mass loss which is completed at  $\sim 650^\circ\text{C}$  for **UCY-15(RE)** is attributed to the decomposition of the ligand OBA<sup>2-</sup>. Lastly the residual mass at  $900^\circ\text{C}$  corresponds to the rare earth oxide of the corresponding RE<sup>III</sup> ion. Details on calculated values for solvent removal and ligand decomposition along with the experimental values obtained from TG analysis are shown in [Table S2](#).

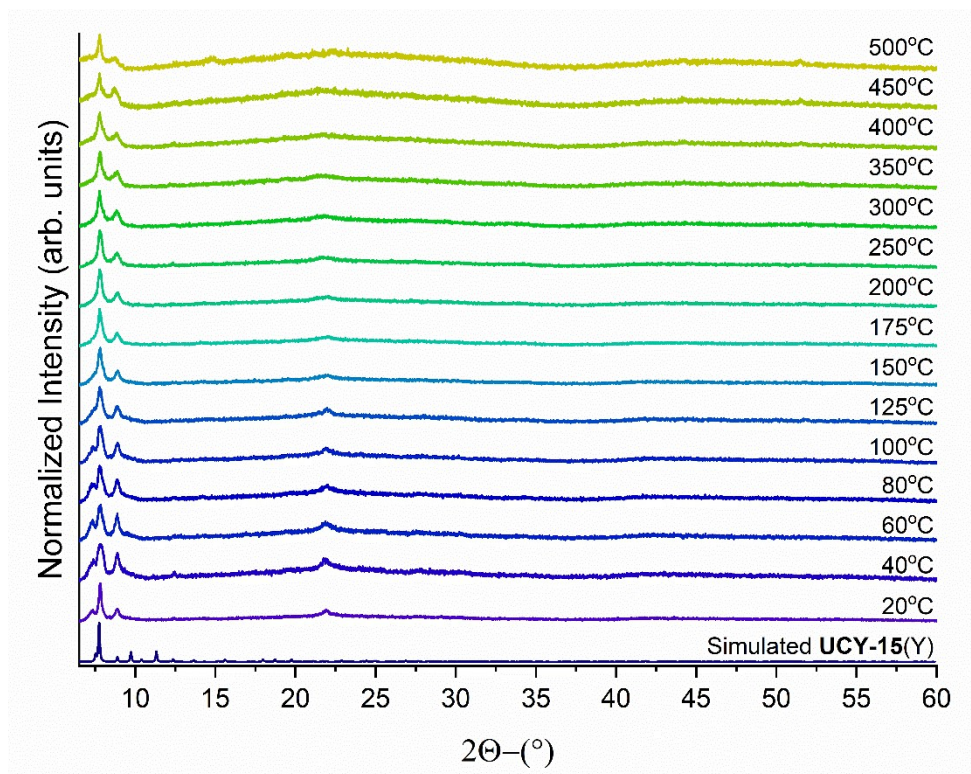

**Figure S8:** Variable temperature powder X-ray diffraction patterns of activated UCY-15(Y).

**Table S3:** Calculated values for solvent removal and ligand combustion along with the experimental values obtained from TG analysis for the as synthesized compounds **UCY-15(RE)**.

| Compound          | Lattice Solvent Removal |                               |      | Ligand Combustion |                               | Residual Oxide   |                               |                                |
|-------------------|-------------------------|-------------------------------|------|-------------------|-------------------------------|------------------|-------------------------------|--------------------------------|
|                   | Temperature (°C)        | Experimental (Calculated) (%) | xDMF | Temperature (°C)  | Experimental (Calculated) (%) | Temperature (°C) | Experimental (Calculated) (%) | Formula                        |
| <b>UCY-15(Y)</b>  | r.t. - 480              | 29 (29)                       | 10   | 480 - 680         | 46 (47)                       | 900              | 25 (24)                       | Y <sub>2</sub> O <sub>3</sub>  |
| <b>UCY-15(Eu)</b> | r.t. - 460              | 31 (32)                       | 14   | 460 - 630         | 37 (38)                       | 900              | 32 (30)                       | Eu <sub>2</sub> O <sub>3</sub> |
| <b>UCY-15(Gd)</b> | r.t. - 460              | 32 (32)                       | 14   | 460 - 650         | 37 (38)                       | 900              | 31 (31)                       | Gd <sub>2</sub> O <sub>3</sub> |
| <b>UCY-15(Tb)</b> | r.t. - 460              | 35 (35)                       | 16   | 460 - 690         | 33 (34)                       | 900              | 32 (31)                       | Tb <sub>4</sub> O <sub>7</sub> |
| <b>UCY-15(Dy)</b> | r.t. - 470              | 32 (33)                       | 15   | 470 - 680         | 36 (37)                       | 900              | 32 (31)                       | Dy <sub>2</sub> O <sub>3</sub> |
| <b>UCY-15(Ho)</b> | r.t. - 470              | 33 (33)                       | 15   | 470 - 650         | 36 (36)                       | 900              | 31 (31)                       | Ho <sub>2</sub> O <sub>3</sub> |
| <b>UCY-15(Er)</b> | r.t. - 470              | 34 (35)                       | 17   | 470 - 670         | 35 (35)                       | 900              | 29 (30)                       | Er <sub>2</sub> O <sub>3</sub> |

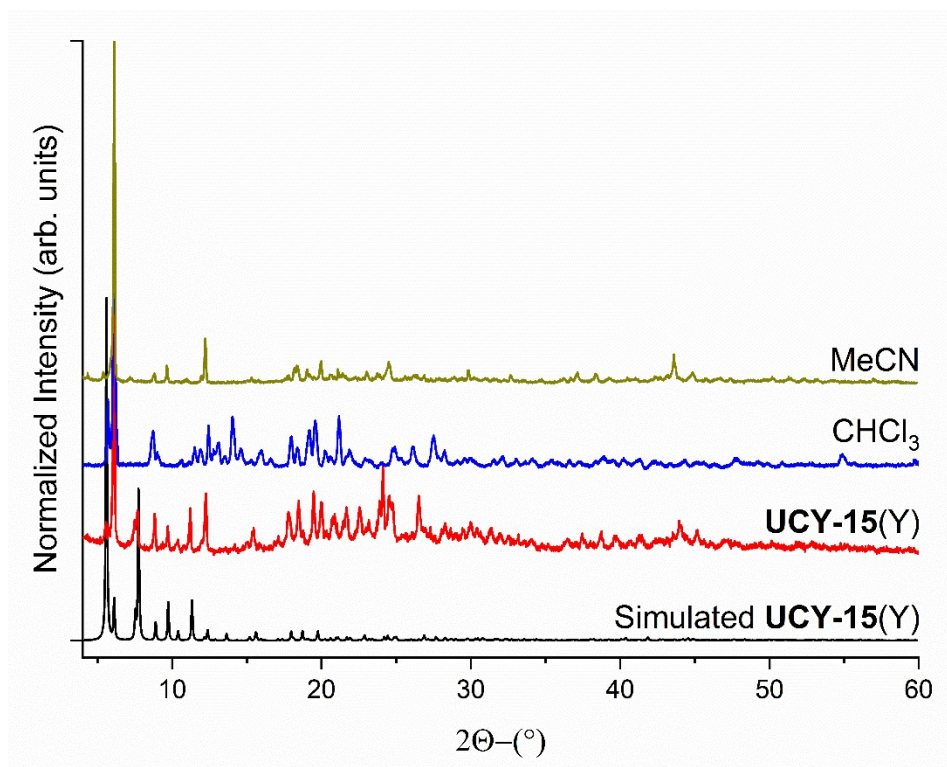

**Figure S9:** Powder X-ray diffraction patterns of as synthesized **UCY-15(Y)** treated (as described in the experimental part) in CHCl<sub>3</sub> and MeCN for 10 days.

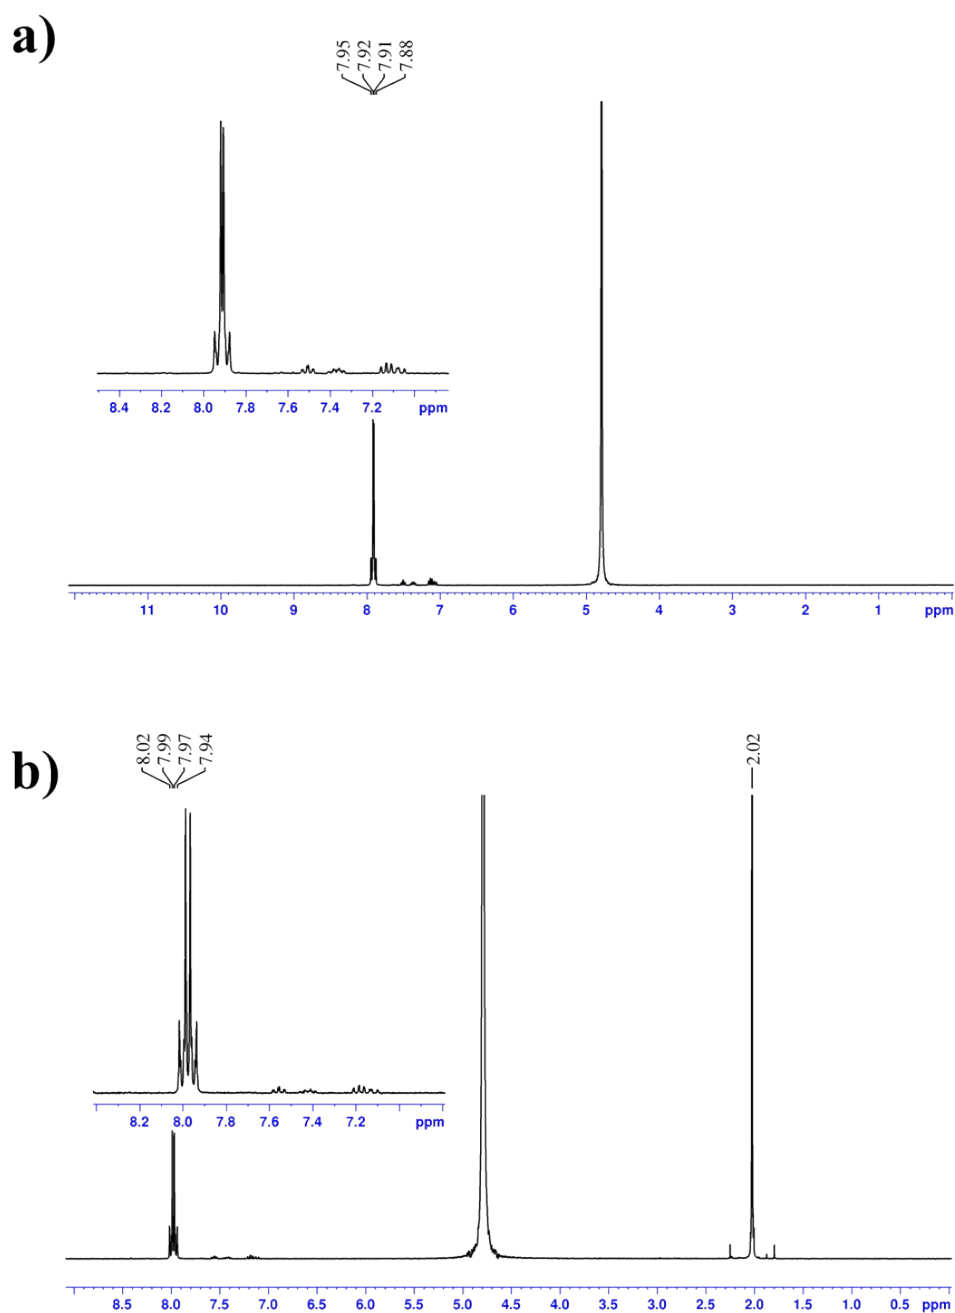

**Figure S10:**  $^1\text{H-NMR}$  spectra of UCY-15(Y) after treatment with a)  $\text{CHCl}_3$  and b) MeCN digested in 0.5M KOH in  $\text{D}_2\text{O}$ . These data indicate the absence of DMF molecules and the presence of the organic ligand  $\text{SDBA}^{2-}$  as well as HFBA in UCY-15(Y).  $^1\text{H NMR (D}_2\text{O)}$ : a)  $\delta$  7.88-7.91 (d, 4H, Ar-H,  $\text{SDBA}^{2-}$ ),  $\delta$  7.92 – 7.95 (d, 4H, Ar-H,  $\text{SDBA}^{2-}$ ). b)  $\delta$  2.02 (s, 3H,  $\text{CH}_3\text{CN}$ ),  $\delta$  4.9 (s, residual solvent peaks),  $\delta$  7.94 – 7.97 (d, 8H, Ar-H,  $\text{SDBA}^{2-}$ ),  $\delta$  7.99 – 8.02 (d, 4H, Ar-H,  $\text{SDBA}^{2-}$ ).

## Gas Sorption Measurements

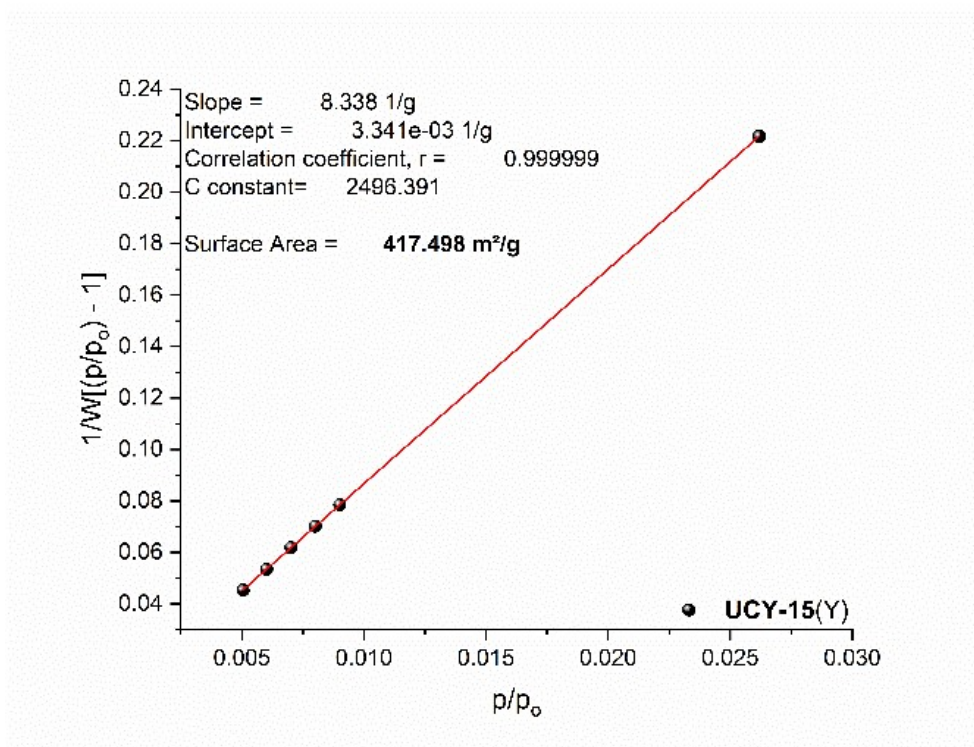

**Figure S11:** BET plot from N<sub>2</sub> adsorption isotherm at 77K for UCY-15(Y).

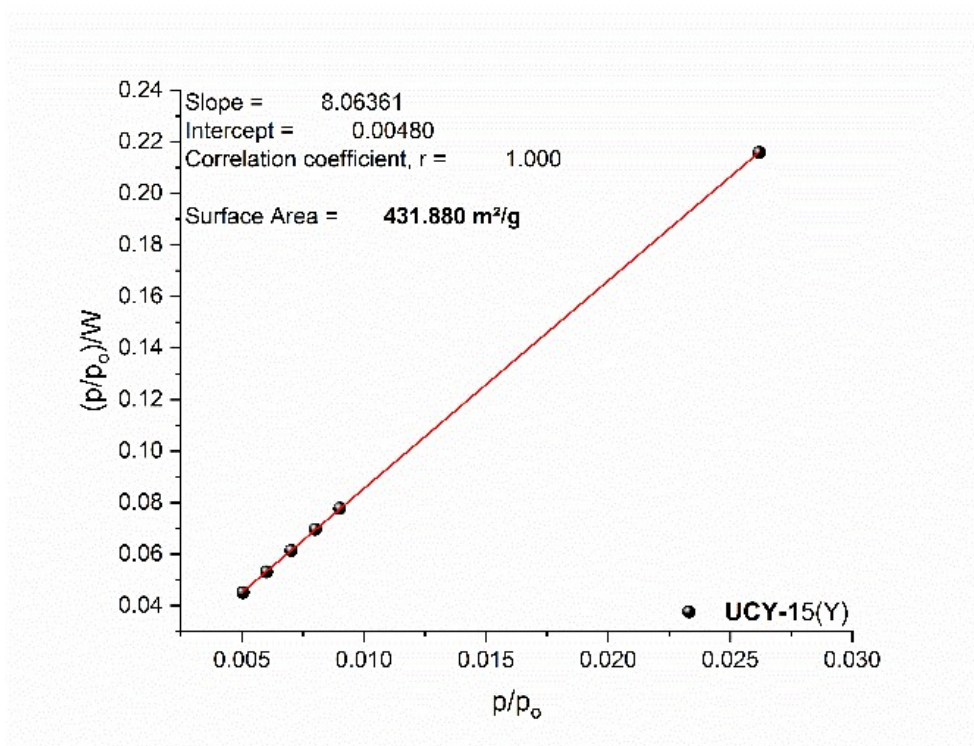

**Figure S12:** Langmuir plot from N<sub>2</sub> adsorption isotherm at 77K for UCY-15(Y).

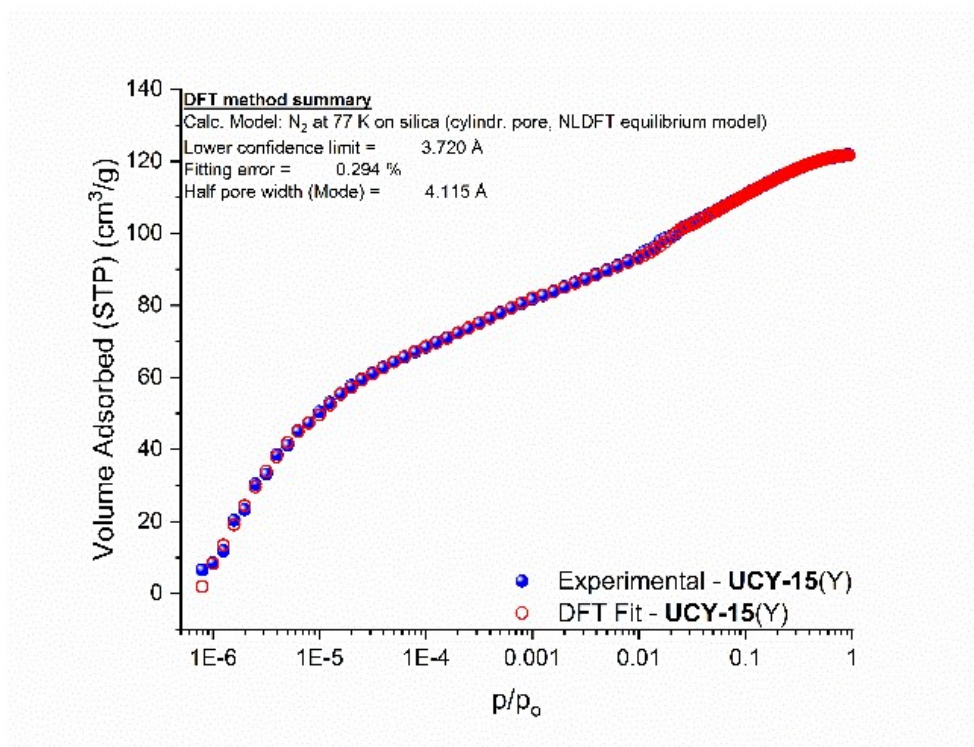

**Figure S13:** N<sub>2</sub> adsorption isotherm recorded at 77K and the corresponding NLDFT fitting for UCY-15(Y).

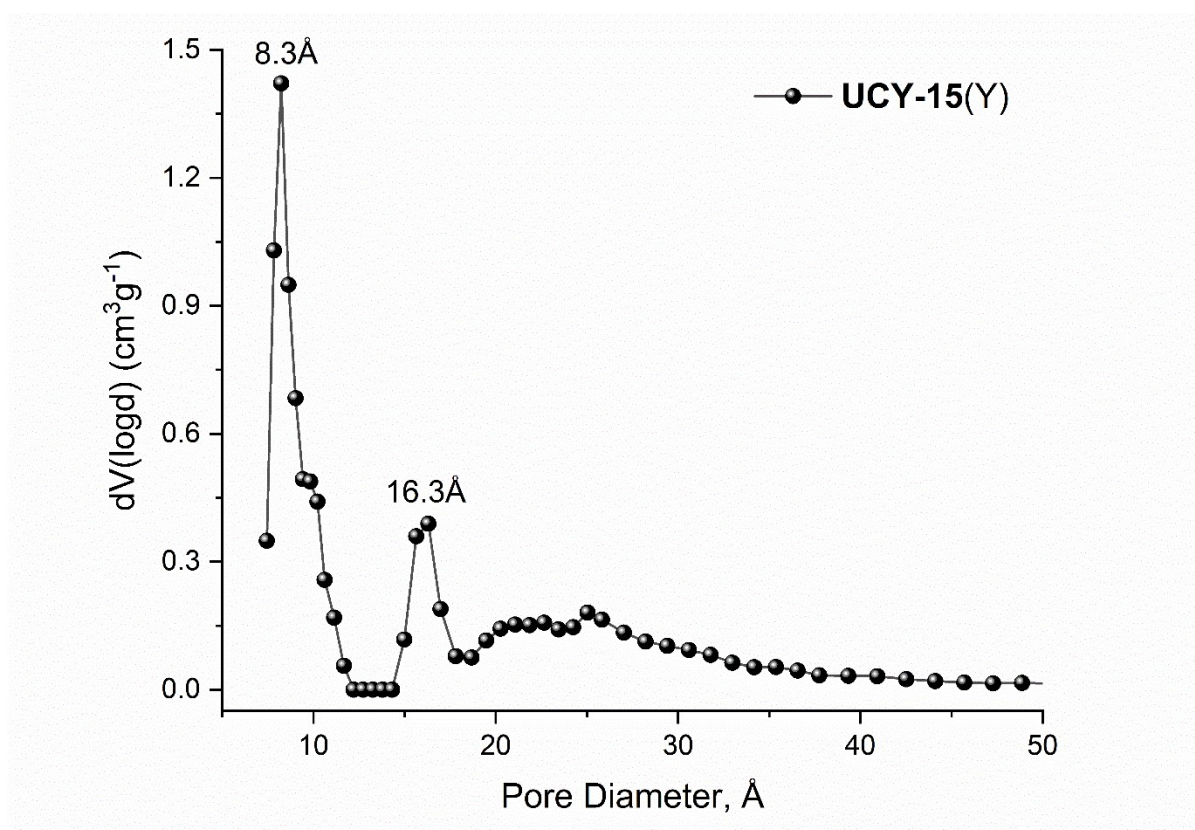

**Figure S14:** Pore size distribution curve of UCY-15(Y) calculated by NLDFT.



## Low pressure CO<sub>2</sub>, sorption isotherms, determination of heat of adsorption.

Heat of adsorption: To calculate heats of adsorptions, the corresponding adsorption isotherms at three different temperatures (273 K, 283K and 293 K) were simultaneously fitted using the virial type<sup>6,7</sup> Equation 1:

$$\ln P = \ln N + \frac{1}{T} \sum_{i=0}^m a_i N^i + \sum_{i=0}^n b_i N^i \quad (1)$$

The heat of adsorption at zero coverage was calculated from Equation 2, where as a function of surface coverage, from Equation 3:

$$Q_{st} = -Ra_o \quad (2)$$

$$Q_{st}(N) = -R \sum_{i=0}^m a_i N^i \quad (3)$$

For the determination of the isosteric heat of adsorption using the Clausius - Clapeyron equation a commercially available software, ASiQwin (version 3.01) purchased from Quantachrome, was used.

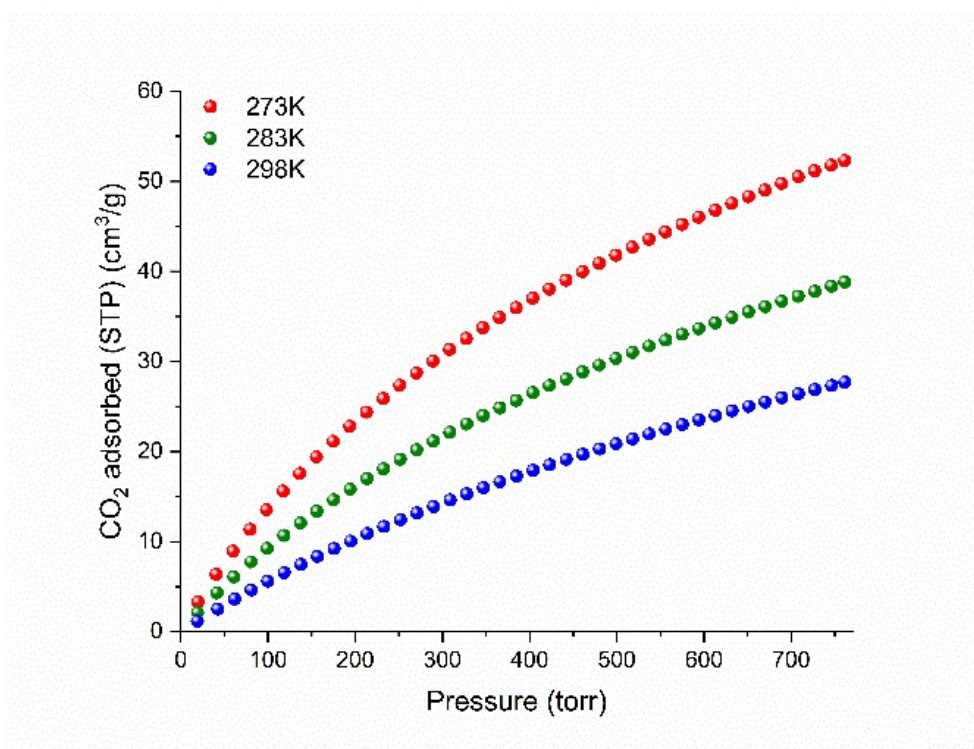

**Figure S15:** CO<sub>2</sub> adsorption isotherm of UCY-15(Y) at 273 K, 283K and 298 K.

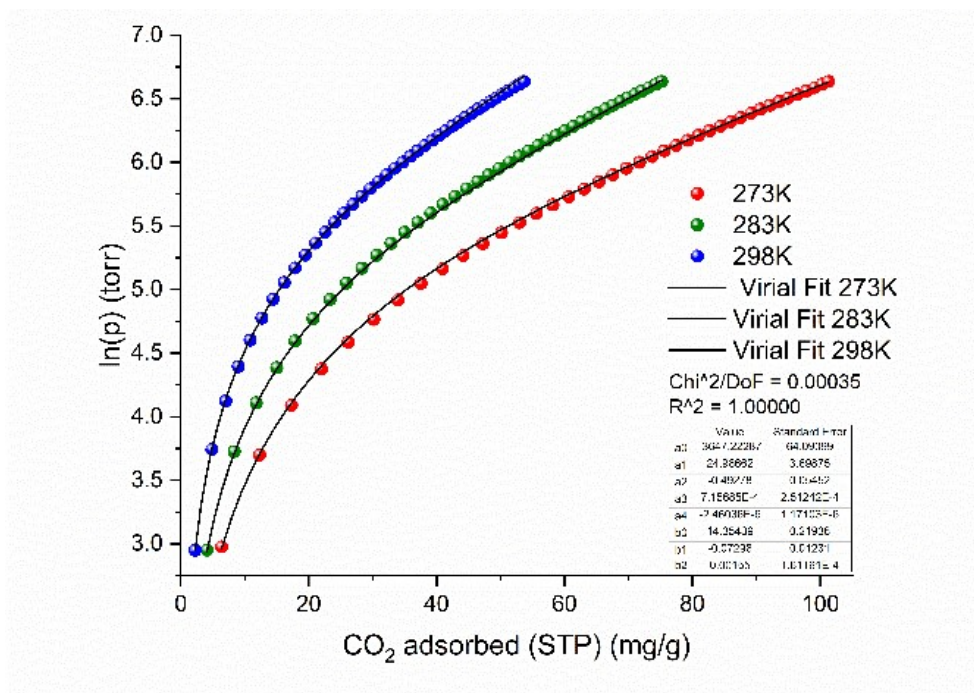

**Figure S16:** Virial type fitting of CO<sub>2</sub> adsorption isotherms of UCY-15(Y) at 273 K, 283 K and 298 K according to equation 1.

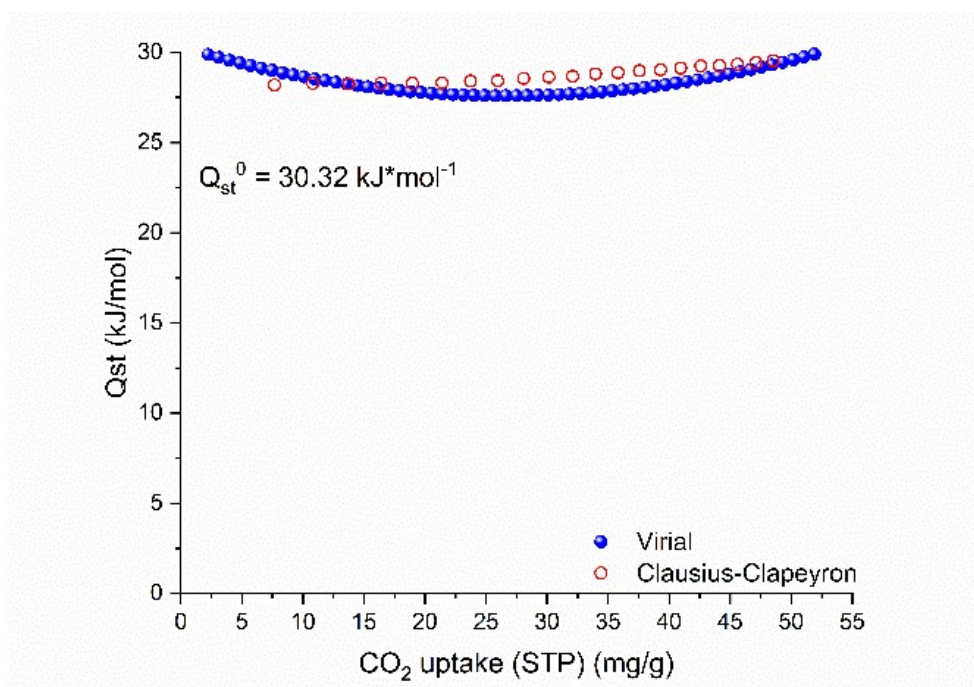

**Figure S17:** CO<sub>2</sub> isosteric heat of adsorption in UCY-15(Y) as a function of surface coverage.

## Photoluminescence Studies

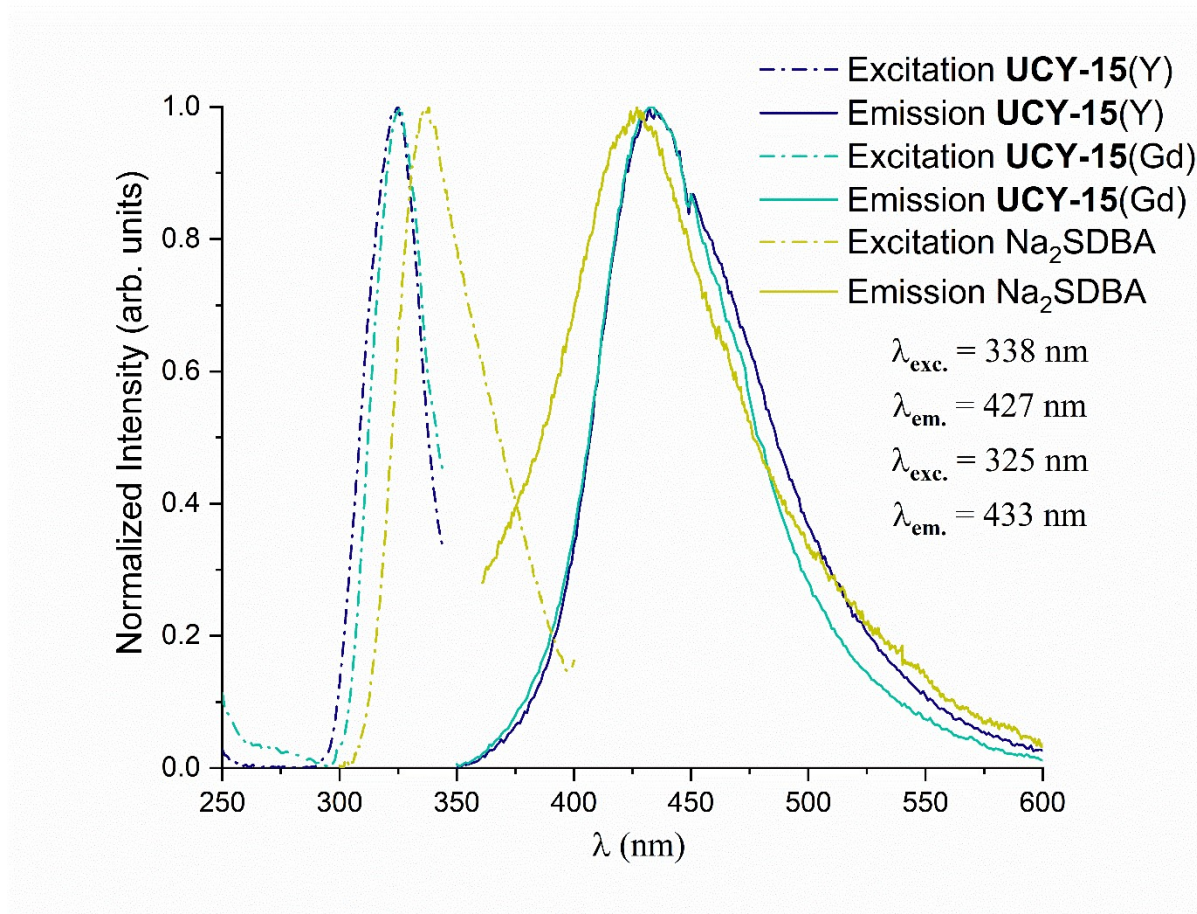

**Figure S18:** Normalized solid state excitation ( $\lambda_{\text{em}} = 433 \text{ nm}$ ,  $23095 \text{ cm}^{-1}$ ) and emission spectra ( $\lambda_{\text{exc}} = 325 \text{ nm}$ ) of the as synthesized compounds **UCY-15(Y)** and **UCY-15(Gd)** and excitation ( $\lambda_{\text{em}} = 427 \text{ nm}$ ) and emission spectra ( $\lambda_{\text{exc}} = 338 \text{ nm}$ ) of **Na<sub>2</sub>SDBA**.

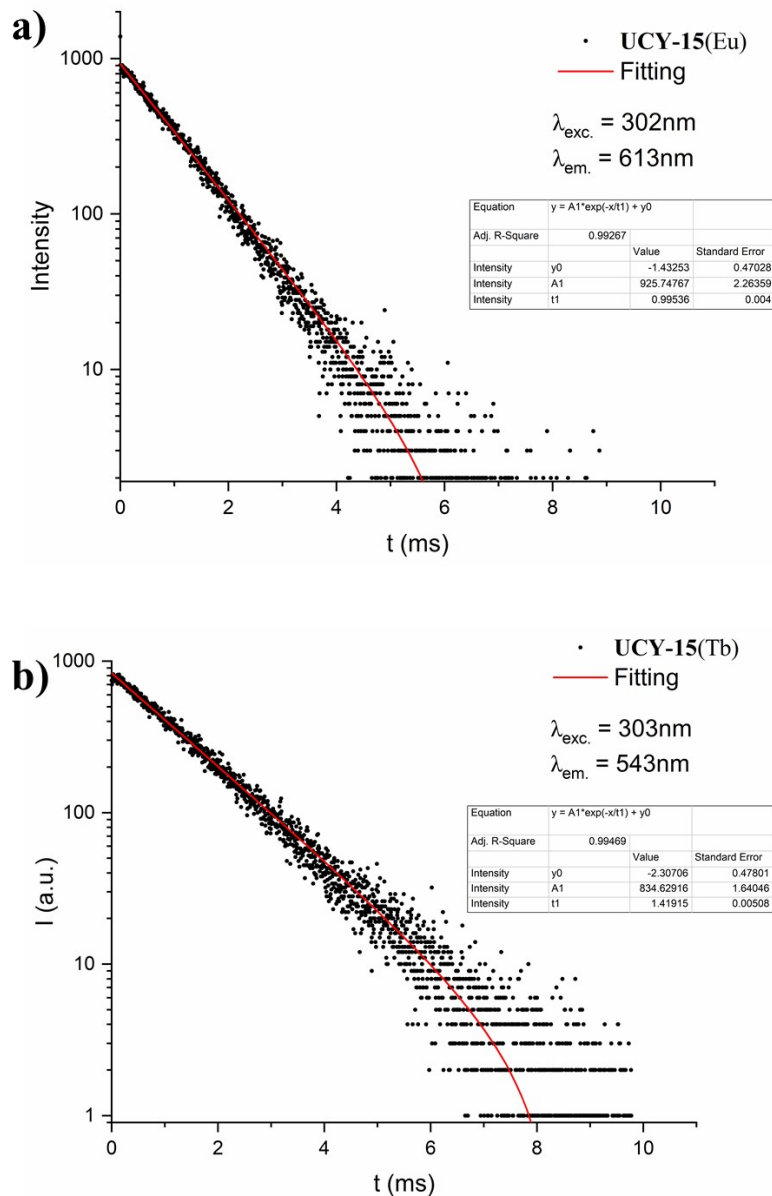

**Figure S19:** The decay of a) UCY-15(Eu) and b) UCY-15(Tb) at the indicated  $\lambda_{em.}$ .

In the case of UCY-15(Eu), it is possible to calculate the radiative lifetime,  $\tau_R$ , of  $\text{Eu}^{3+}$  from the analysis of the lanthanide emission profile using eqn. (1)<sup>8</sup> where  $A_{MD,0}$  is the probability of spontaneous emission of the  ${}^5\text{D}_0 \rightarrow {}^7\text{F}_1$  transition *in vacuo* ( $14.65 \text{ s}^{-1}$ ),  $n$  is the refractive index of the material (estimated at 1.5<sup>9</sup>) and  $I_{tot}/I_{MD}$  is the ratio of the total integrated intensity of the  $\text{Eu}^{3+}$  emission to the area of the  ${}^5\text{D}_0 \rightarrow {}^7\text{F}_1$  band. With the use of eqn. (2) we obtained a value of  $\tau_R^{Eu} = 2.66 \text{ ms}$  which led to an estimated value for the emission quantum yield of the  $\text{Eu}^{3+}$  ion,  $\Phi_{Eu}^{Eu} = \tau_{obs}/\tau_R$ , of *ca.* 38%.

$$\frac{1}{\tau_R} = A_{MD,0} n^3 \left( \frac{I_{tot}}{I_{MD}} \right) \quad (2)$$

### Thin film characterisation and sensing studies

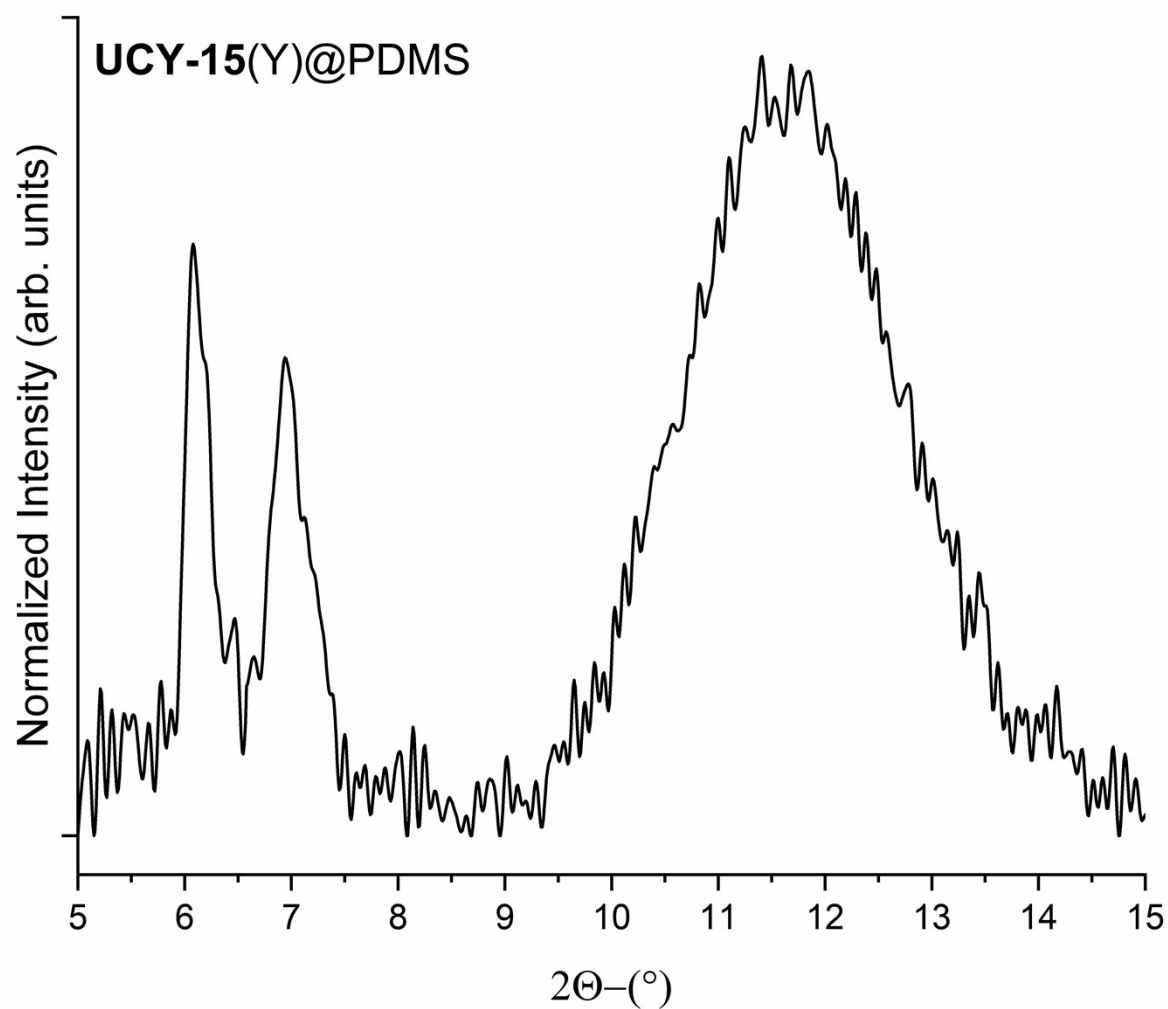

**Figure S20:** μ-XRD diffractogram of UCY-15(Y)@PDMS.

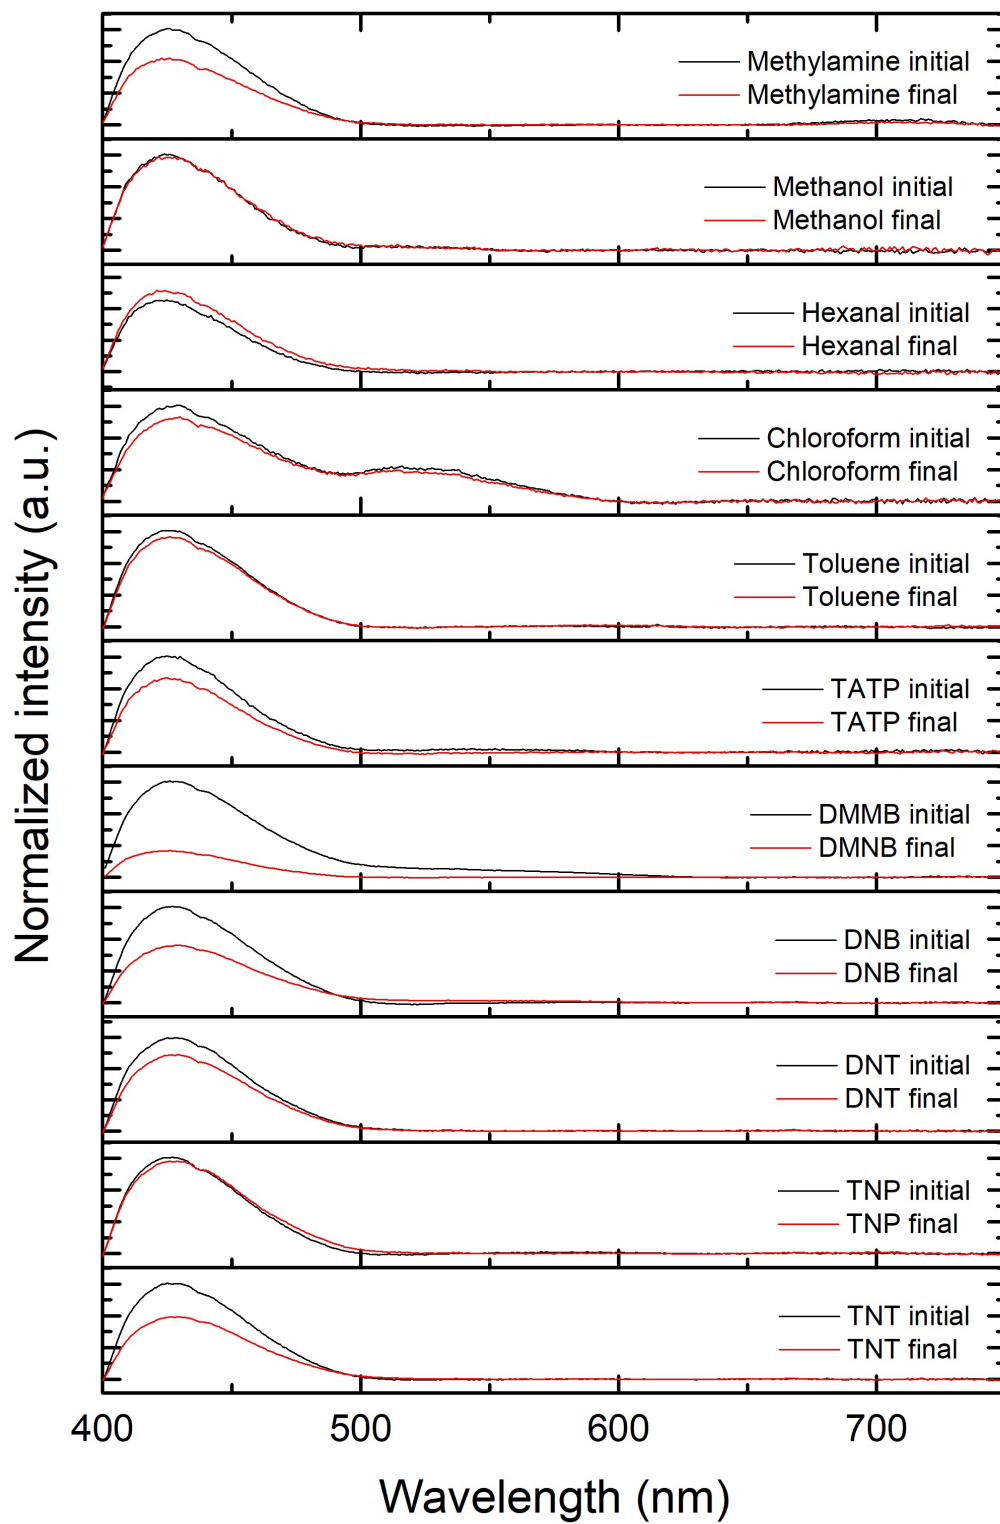

**Figure S21:** Photoluminescence emission spectra of UCY-15(Y)@PDMS films before (black line) and after (red line) exposure to saturated vapours of the indicated analytes.

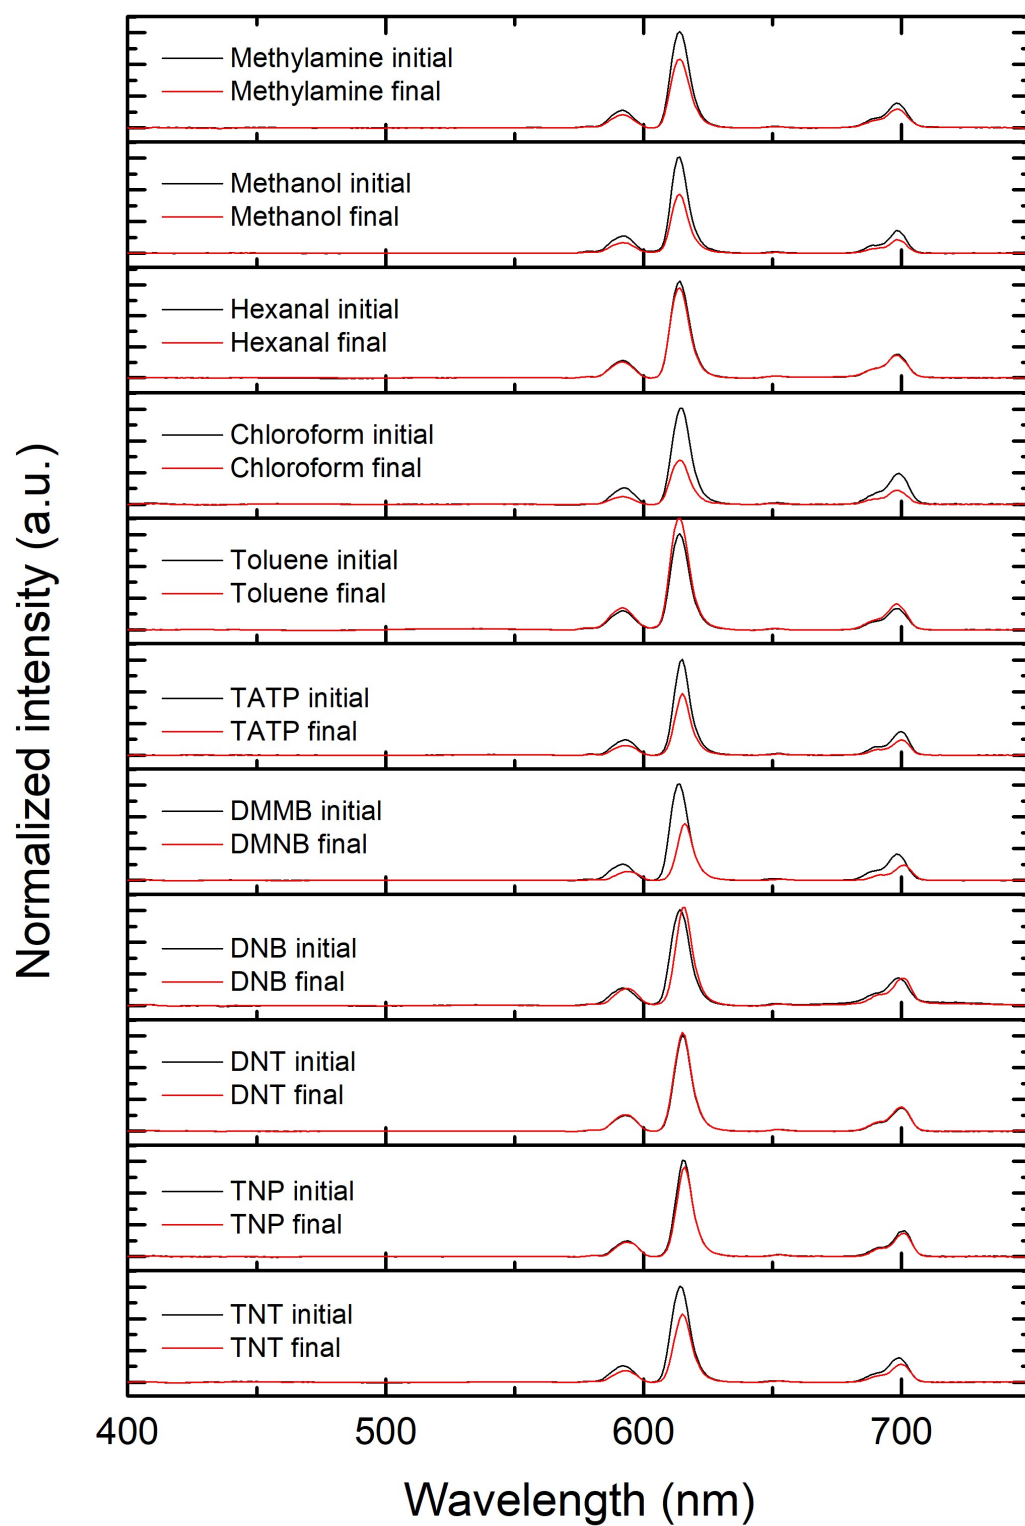

**Figure S22:** Photoluminescence emission spectra of UCY-15(Eu)@PDMS films before (black line) and after (red line) exposure to saturated vapours of the indicated analytes.

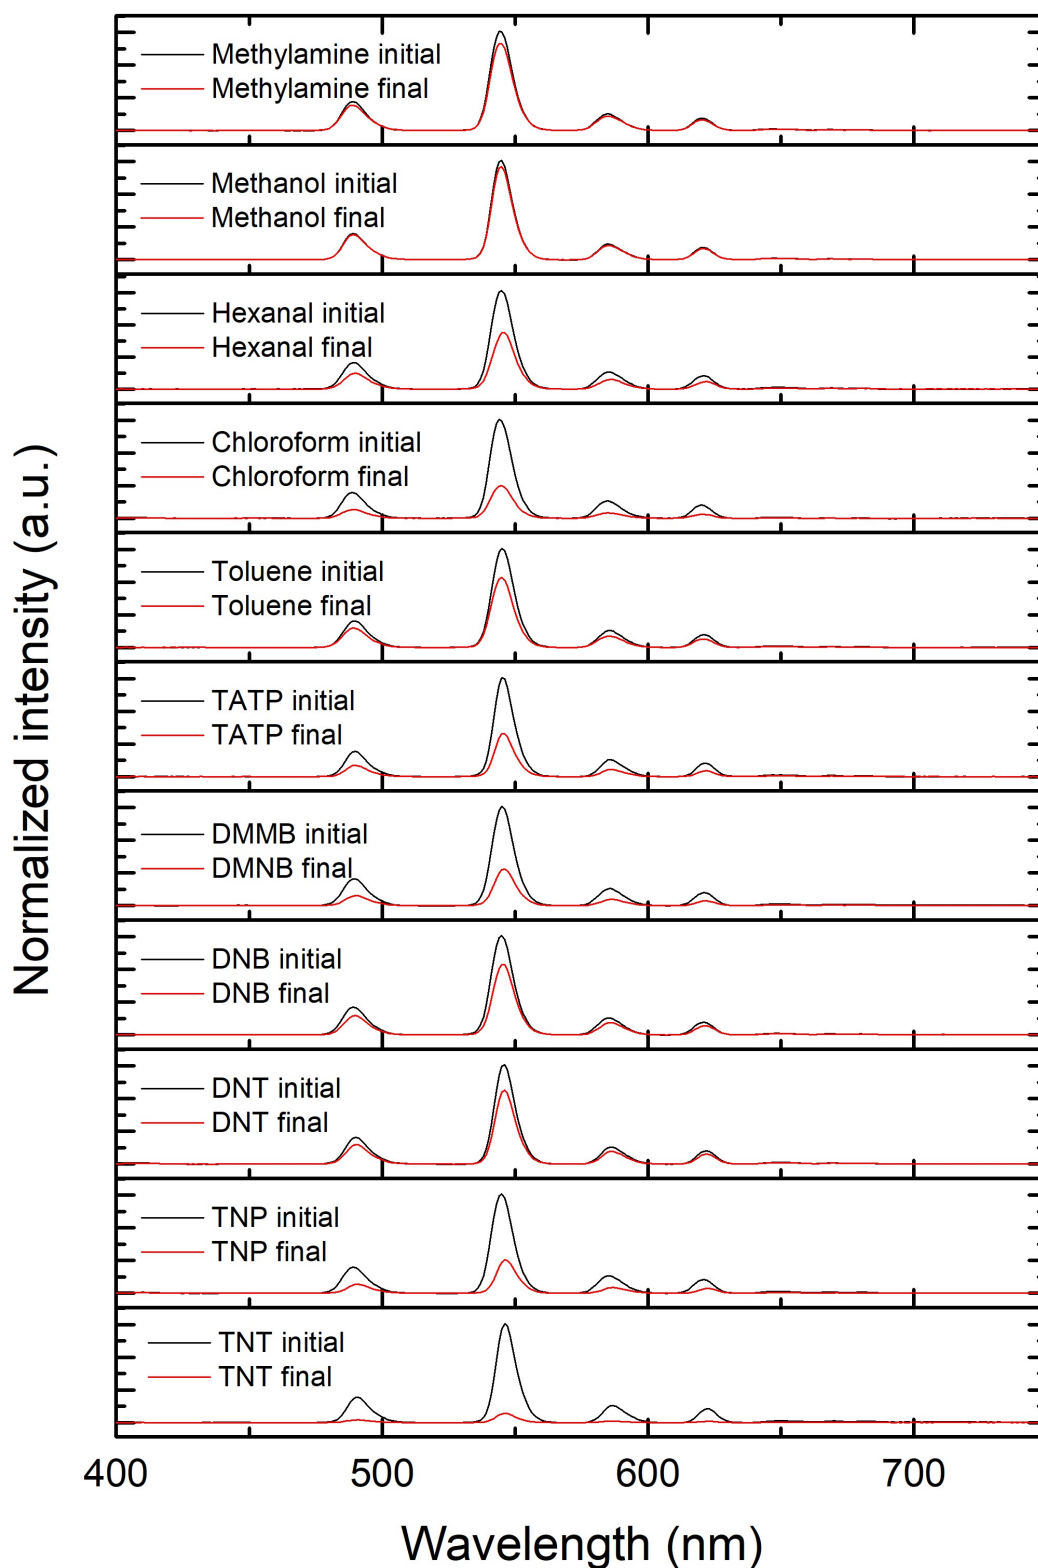

**Figure S23:** Photoluminescence emission spectra of UCY-15(Tb)@PDMS films before (black line) and after (red line) exposure to saturated vapours of the indicated analytes.



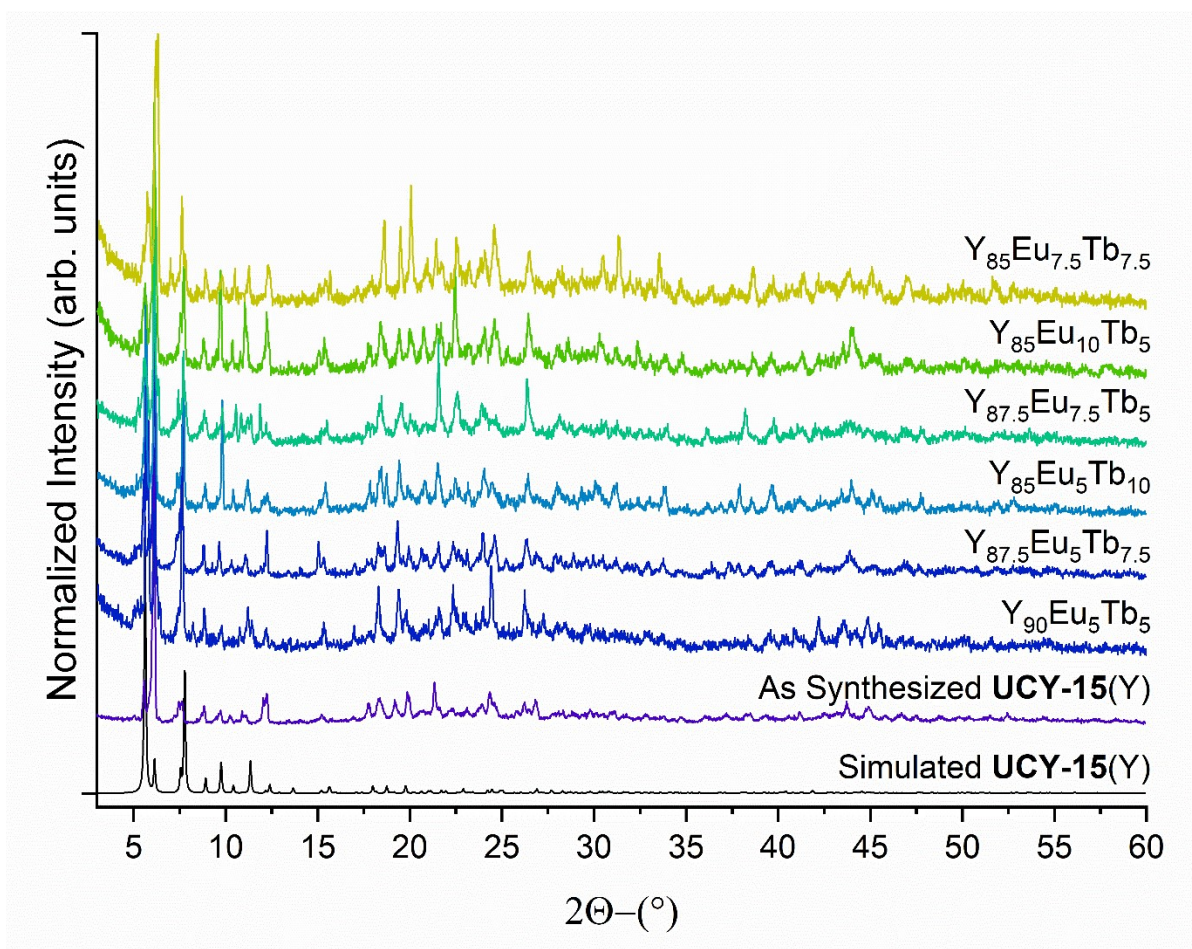

**Figure S24:** Powder X-ray diffraction patterns of the compound **UCY-15(Y)** and doped analogues **UCY-15( $Y_{100-x-y}Eu_xTb_y$ )** ( $x, y = 5, 7.5, 10$ ) along with the simulated pattern from single crystal data of **UCY-15(Y)**.

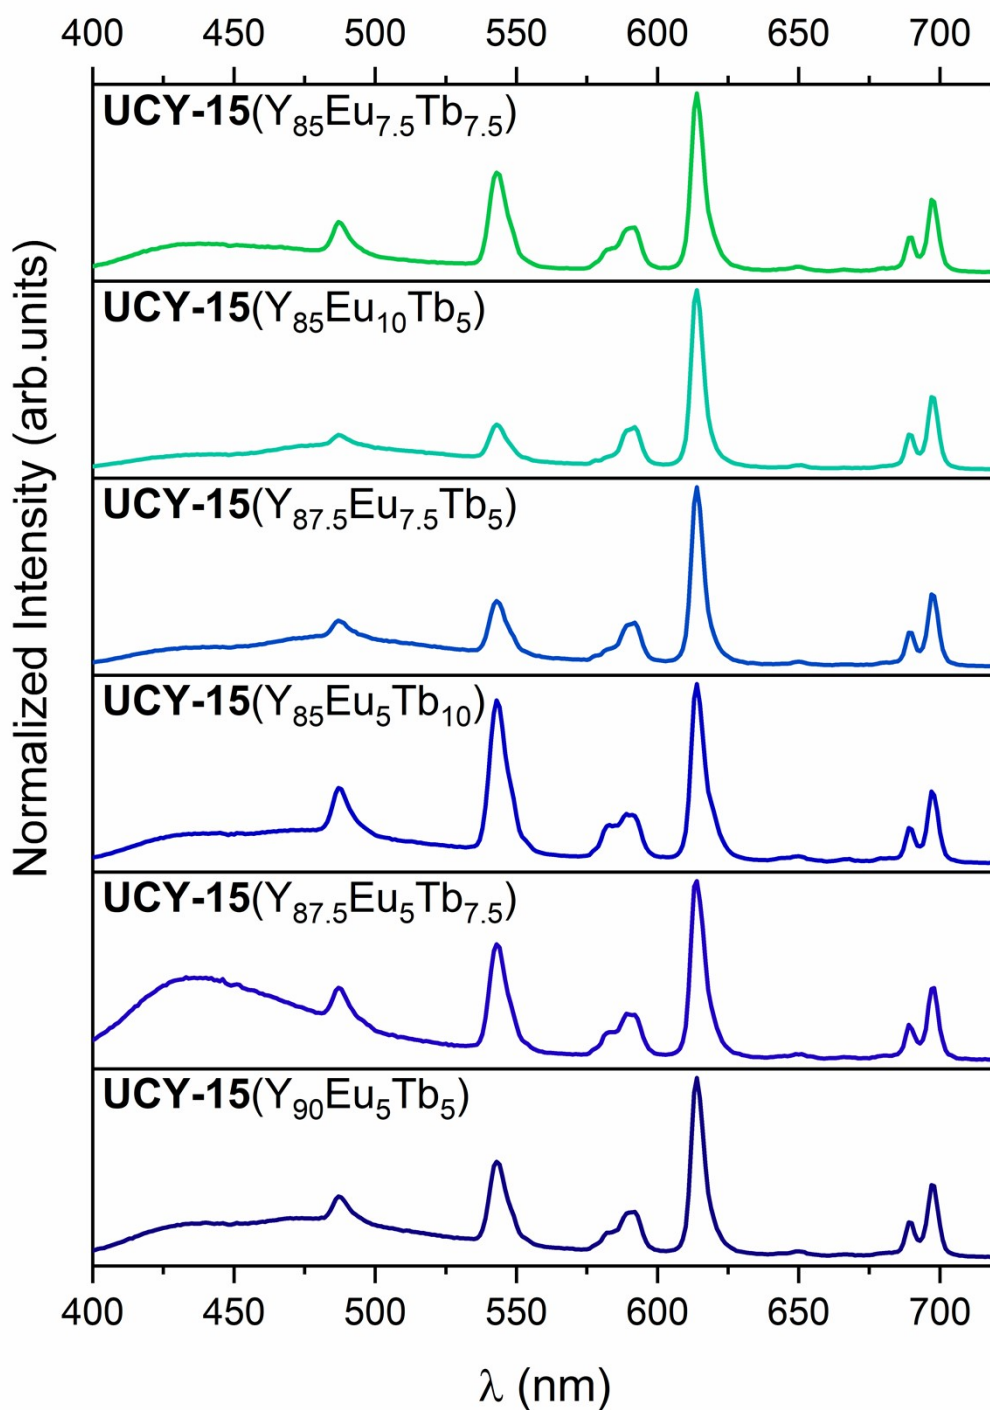

**Figure S25:** Normalized solid state emission spectra ( $\lambda_{\text{exc}} = 325$  nm) of the as synthesized compounds **UCY-15**( $\text{Y}_{100-x-y}\text{Eu}_x\text{Tb}_y$ ) ( $x, y = 5, 7.5, 10$ ). In each luminescence spectrum a broad band at  $\sim 430$  nm due to  $\text{SDBA}^{2-}$  emission as well as sharp bands at 578, 591, 613, 651, 699 nm due to  $\text{Eu}^{3+}$  and 487, 543 and 582 nm due to  $\text{Tb}^{3+}$  ions, are observed.

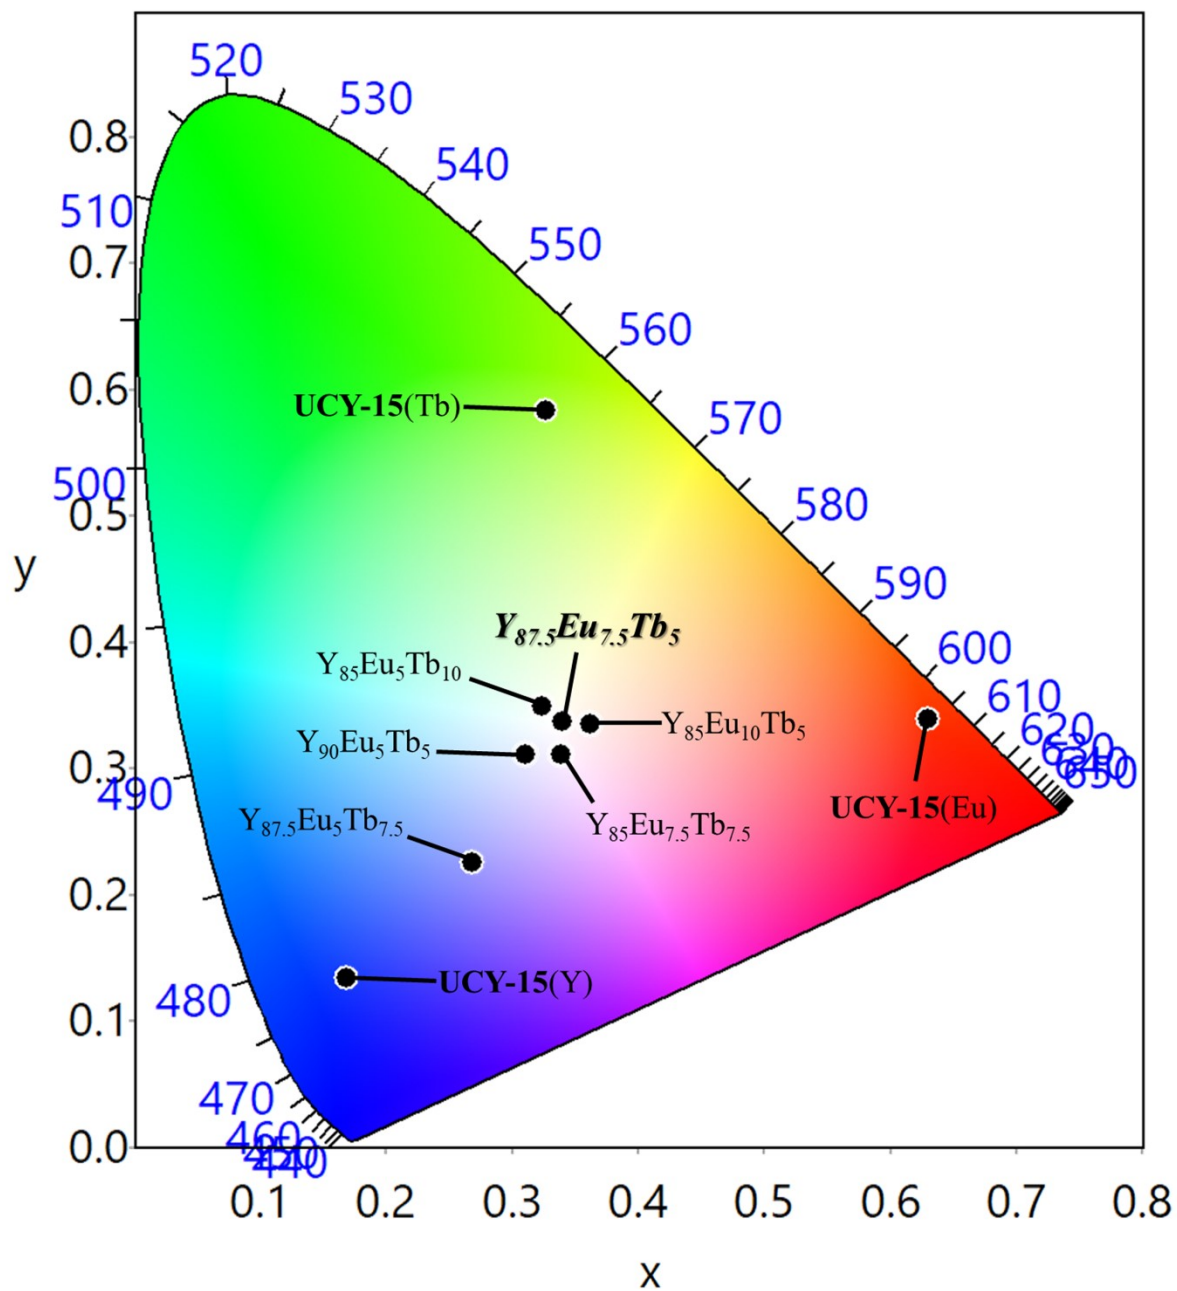

**Figure S26:** Chromaticity coordinates (CIE 1931) calculated from the corrected emission profiles of UCY-15(Y), UCY-15(Eu), UCY-15(Tb) and UCY-15( $Y_{100-x-y}Eu_xTb_y$ ) ( $x, y = 5, 7.5, 10$ ). This figure shows that the combination of the luminescence from  $SDBA^{2-}$ ,  $Eu^{3+}$  and  $Tb^{3+}$  results in an analogue emitting white light with coordinates (0.339, 0.337).

**Table S4:** Chromaticity coordinates of the **UCY-15**(Y<sub>100-x-y</sub>Eu<sub>x</sub>Tb<sub>y</sub>) (x, y = 5, 7.5, 10) doped compounds.

| Compound                                                             | Coordinates |        |
|----------------------------------------------------------------------|-------------|--------|
|                                                                      | x           | y      |
| <b>UCY-15</b> (Y <sub>90</sub> Eu <sub>5</sub> Tb <sub>5</sub> )     | 0.31        | 0.311  |
| <b>UCY-15</b> (Y <sub>87.5</sub> Eu <sub>5</sub> Tb <sub>7.5</sub> ) | 0.268       | 0.226  |
| <b>UCY-15</b> (Y <sub>85</sub> Eu <sub>5</sub> Tb <sub>10</sub> )    | 0.324       | 0.337  |
| <b>UCY-15</b> (Y <sub>87.5</sub> Eu <sub>7.5</sub> Tb <sub>5</sub> ) | 0.339       | 0.337  |
| <b>UCY-15</b> (Y <sub>85</sub> Eu <sub>10</sub> Tb <sub>5</sub> )    | 0.362       | 0.335  |
| <b>UCY-15</b> (Y <sub>85</sub> Eu <sub>7.5</sub> Tb <sub>7.5</sub> ) | 0.339       | 0.3108 |

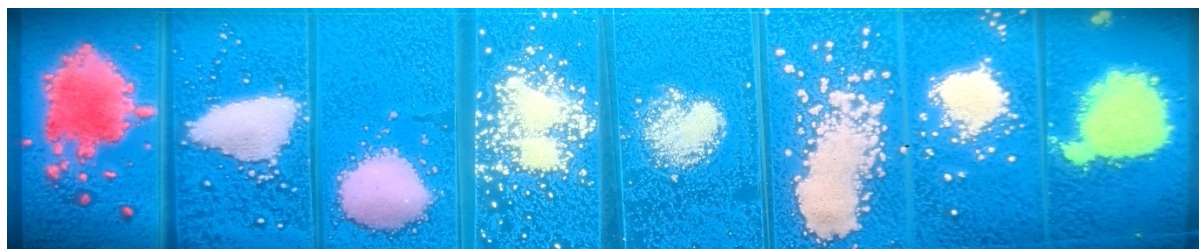

**Figure S27:** Digital photographs of **UCY-15**(RE) under a conventional UV lamp operating at 365nm. From left to right: **UCY-15**(Eu), **UCY-15**(Y<sub>90</sub>Eu<sub>5</sub>Tb<sub>5</sub>), **UCY-15**(Y<sub>87.5</sub>Eu<sub>5</sub>Tb<sub>7.5</sub>), **UCY-15**(Y<sub>85</sub>Eu<sub>5</sub>Tb<sub>10</sub>), **UCY-15**(Y<sub>87.5</sub>Eu<sub>7.5</sub>Tb<sub>5</sub>), **UCY-15**(Y<sub>85</sub>Eu<sub>10</sub>Tb<sub>5</sub>), **UCY-15**(Y<sub>85</sub>Eu<sub>7.5</sub>Tb<sub>7.5</sub>) and **UCY-15**(Tb).

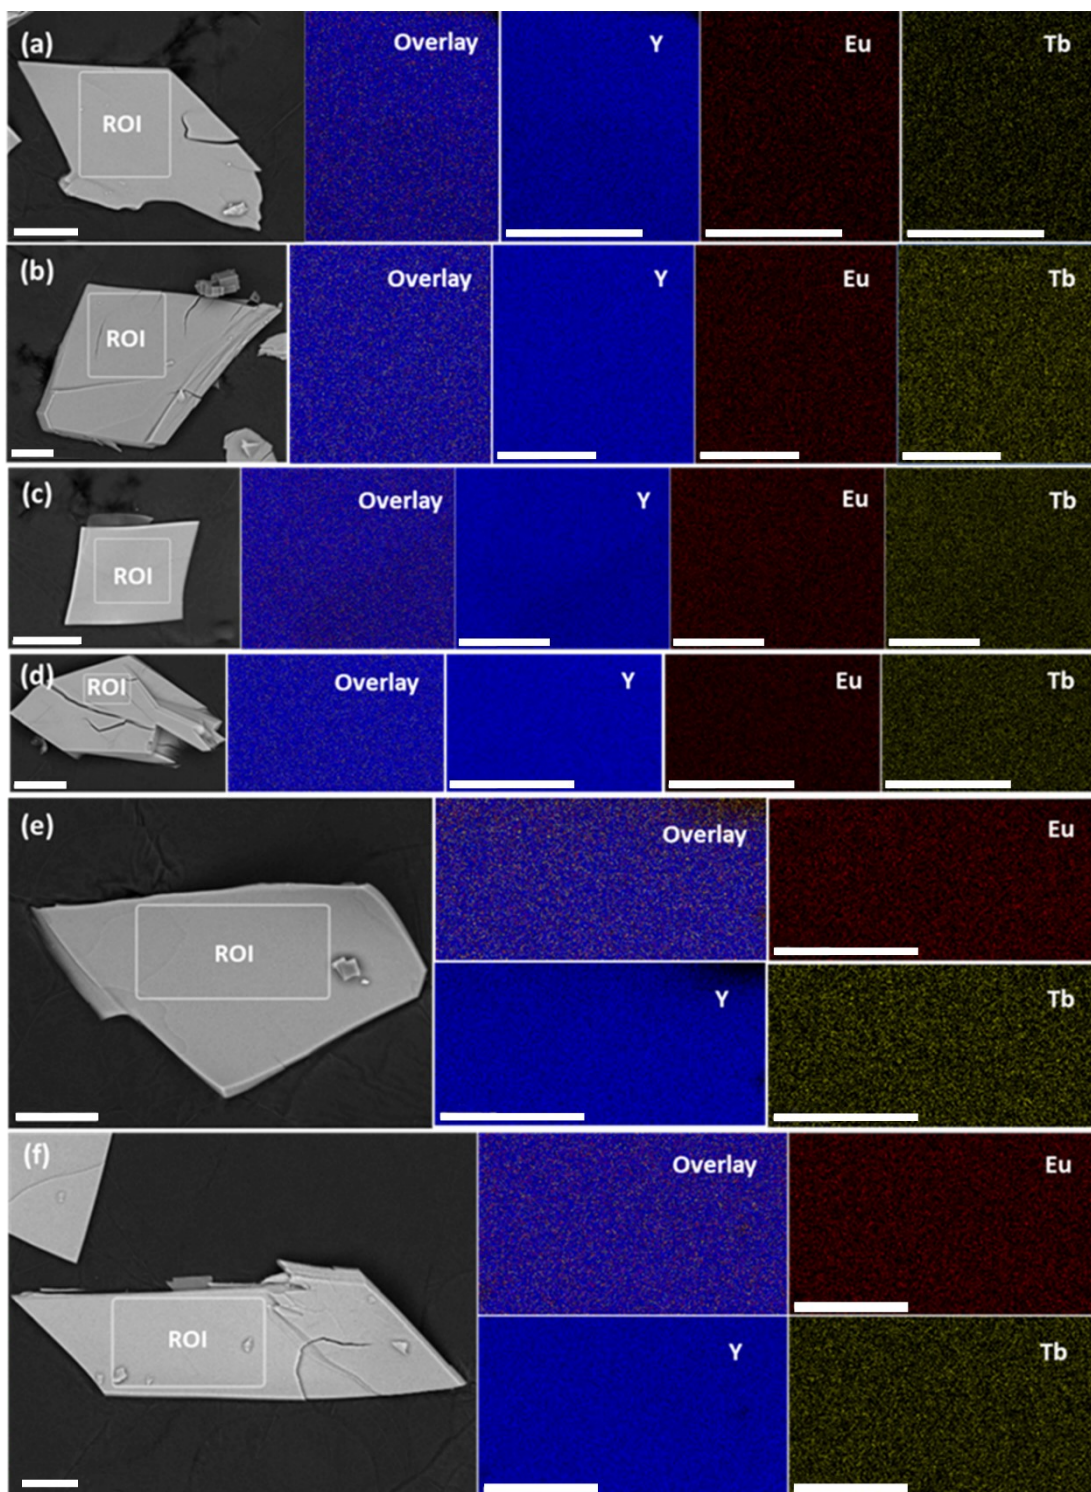

**Figure S28:** SEM-EDX mapping of UCY-15 samples: a)  $Y_{90}Eu_5Tb_5$ , b)  $Y_{87.5}Eu_5Tb_{7.5}$ , c)  $Y_{85}Eu_5Tb_{10}$ , d)  $Y_{87.5}Eu_{7.5}Tb_5$ , e)  $Y_{85}Eu_{10}Tb_5$  and f)  $Y_{85}Eu_{7.5}Tb_{7.5}$ . In all cases, the images of the individual metal ions and the overlay correspond to the region of interest (ROI) mapped in the crystal shown in the left images. The equivalence of the scale bar is 50  $\mu\text{m}$ .

**Table S5:** The (%) ratio of Y<sup>3+</sup>, Eu<sup>3+</sup> and Tb<sup>3+</sup> ions of **UCY-15**(Y<sub>100-x-y</sub>Eu<sub>y</sub>Tb<sub>x</sub>) based on EDX results. The error was estimated through the standard deviation ( $\sigma$ ) of three independent measurements.

|                                                                      | Theoretical (%) |        |        | Experimental (%) |          |         |
|----------------------------------------------------------------------|-----------------|--------|--------|------------------|----------|---------|
|                                                                      | Y (100-x-y)     | Eu (x) | Tb (y) | Y                | Eu       | Tb      |
| <b>UCY-15</b> (Y <sub>90</sub> Eu <sub>5</sub> Tb <sub>5</sub> )     | 90              | 5      | 5      | 90.0±0.1         | 5±0.5    | 5±0.1   |
| <b>UCY-15</b> (Y <sub>87.5</sub> Eu <sub>5</sub> Tb <sub>7.5</sub> ) | 87.5            | 5      | 7.5    | 88.7±2.1         | 5.5±0.8  | 5.8±0.3 |
| <b>UCY-15</b> (Y <sub>85</sub> Eu <sub>5</sub> Tb <sub>10</sub> )    | 85              | 5      | 10     | 86.0±1.4         | 5.7±0.8  | 7.4±1.3 |
| <b>UCY-15</b> (Y <sub>87.5</sub> Eu <sub>7.5</sub> Tb <sub>5</sub> ) | 87.5            | 7.5    | 5      | 87.0±0.1         | 8.5±1.8  | 4.8±2.0 |
| <b>UCY-15</b> (Y <sub>85</sub> Eu <sub>10</sub> Tb <sub>5</sub> )    | 85              | 10     | 5      | 84.3±1.5         | 10.8±1.4 | 5.2±3.1 |
| <b>UCY-15</b> (Y <sub>85</sub> Eu <sub>7.5</sub> Tb <sub>7.5</sub> ) | 85              | 7.5    | 7.5    | 86.0±0.1         | 7.5±0.7  | 7.0±0.1 |

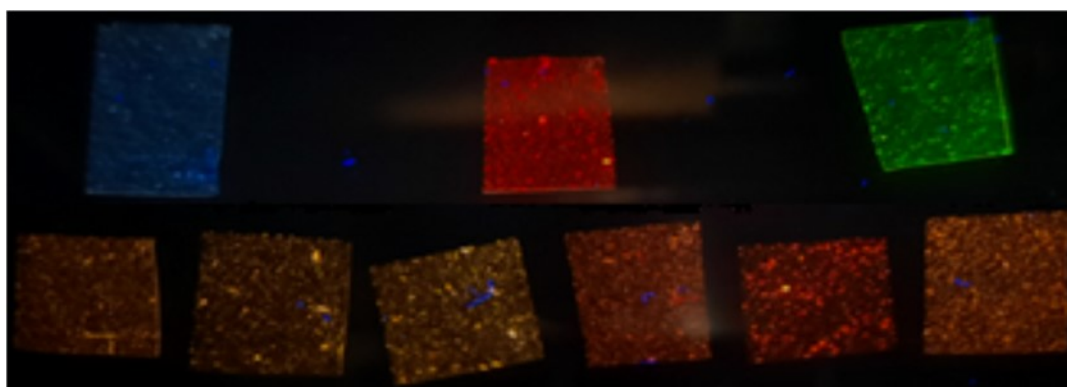

**Figure S29:** Digital photographs of **UCY-15(RE)@PDMS** films illuminated with UV light ( $\lambda_{ex}=300-375$  nm). Top from left to right: **UCY-15**(Y), **UCY-15**(Eu) and **UCY-15**(Tb); bottom from left to right: **UCY-15**(Y<sub>90</sub>Eu<sub>5</sub>Tb<sub>5</sub>), **UCY-15**(Y<sub>87.5</sub>Eu<sub>5</sub>Tb<sub>7.5</sub>), **UCY-15**(Y<sub>85</sub>Eu<sub>5</sub>Tb<sub>10</sub>), **UCY-15**(Y<sub>87.5</sub>Eu<sub>7.5</sub>Tb<sub>5</sub>), **UCY-15**(Y<sub>85</sub>Eu<sub>10</sub>Tb<sub>5</sub>) and **UCY-15**(Y<sub>85</sub>Eu<sub>7.5</sub>Tb<sub>7.5</sub>).

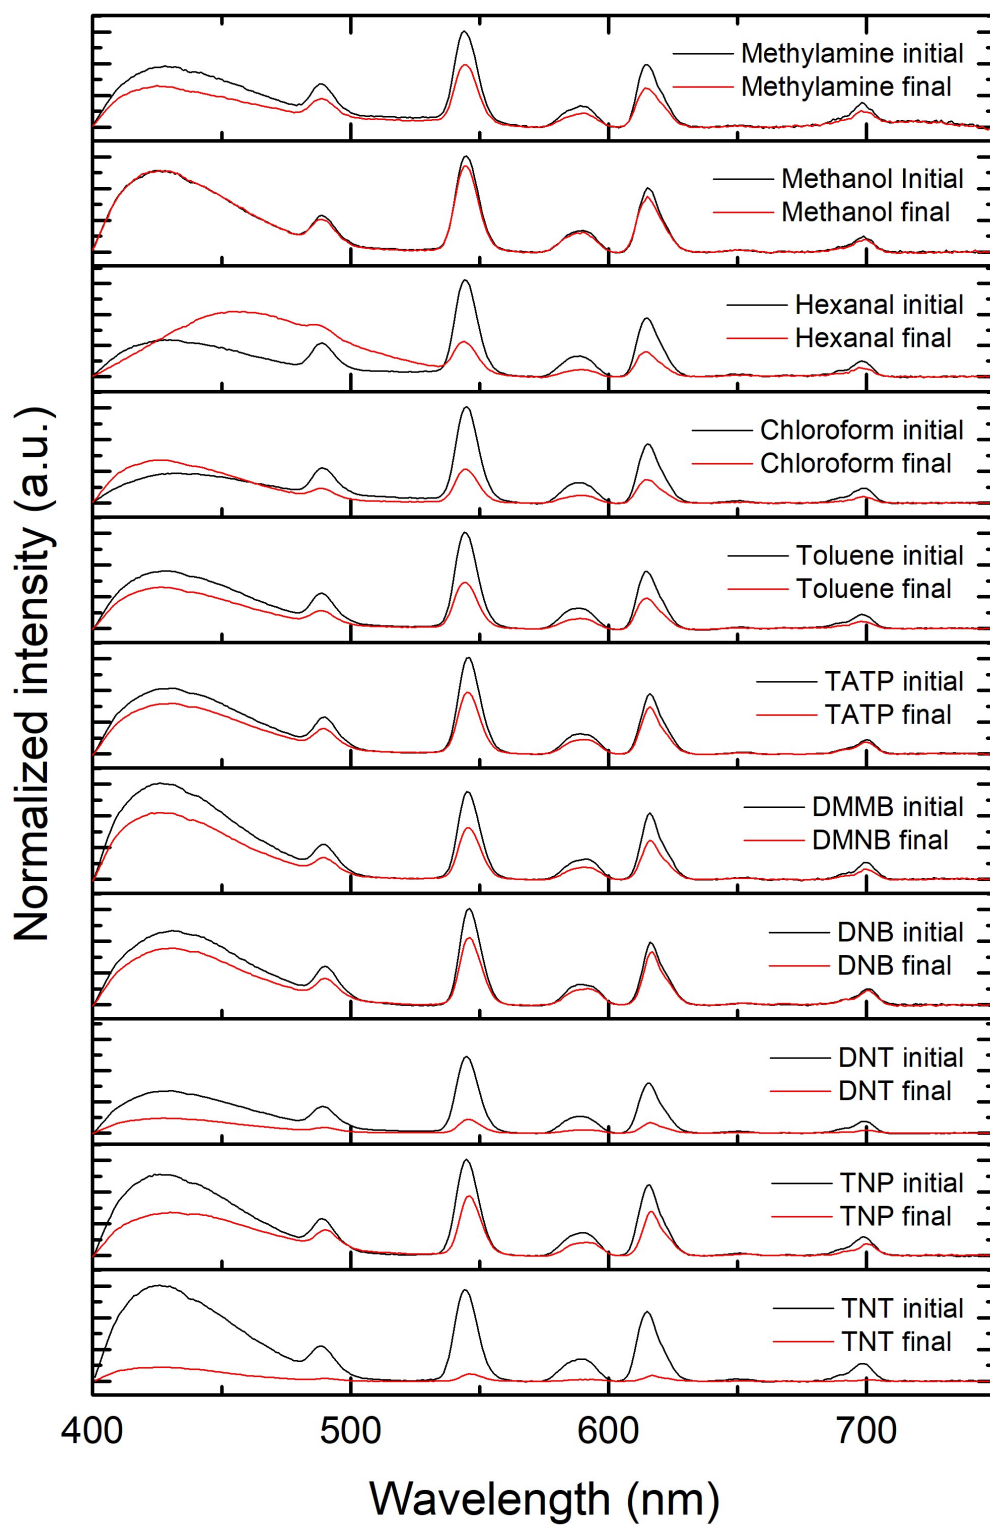

**Figure S30:** Photoluminescence emission spectra of  $\text{UCY-15}(\text{Y}_{87.5}\text{Eu}_5\text{Tb}_{7.5})\text{@PDMS}$  before (black line) and after (red line) exposure to saturated vapours of the selected analytes.

**Table S6:** Relative photoluminescence change (quenching, %) of **UCY-15**(Y<sub>87.5</sub>Eu<sub>5</sub>Tb<sub>7.5</sub>)@PDMS upon exposure to the different nitro-compounds. The concentration (v/v) was calculated at room temperature (25°C).

| <b>Analyte</b> | <b>Gas concentration<sup>3</sup></b> | <b>Quenching (%)</b> | <b>Normalized response (ppb<sup>-1</sup>)</b> |
|----------------|--------------------------------------|----------------------|-----------------------------------------------|
| TNT            | 7.23 ppb                             | 78                   | 10.8                                          |
| TNP            | 0.98 ppb                             | 16.9                 | 17.2                                          |
| DNT            | 346 ppb                              | 82                   | 0.2                                           |
| DNB            | 1.16 ppm                             | 30                   | 0.03                                          |
| DMNB           | 2.59 ppm                             | 24.5                 | 0.01                                          |



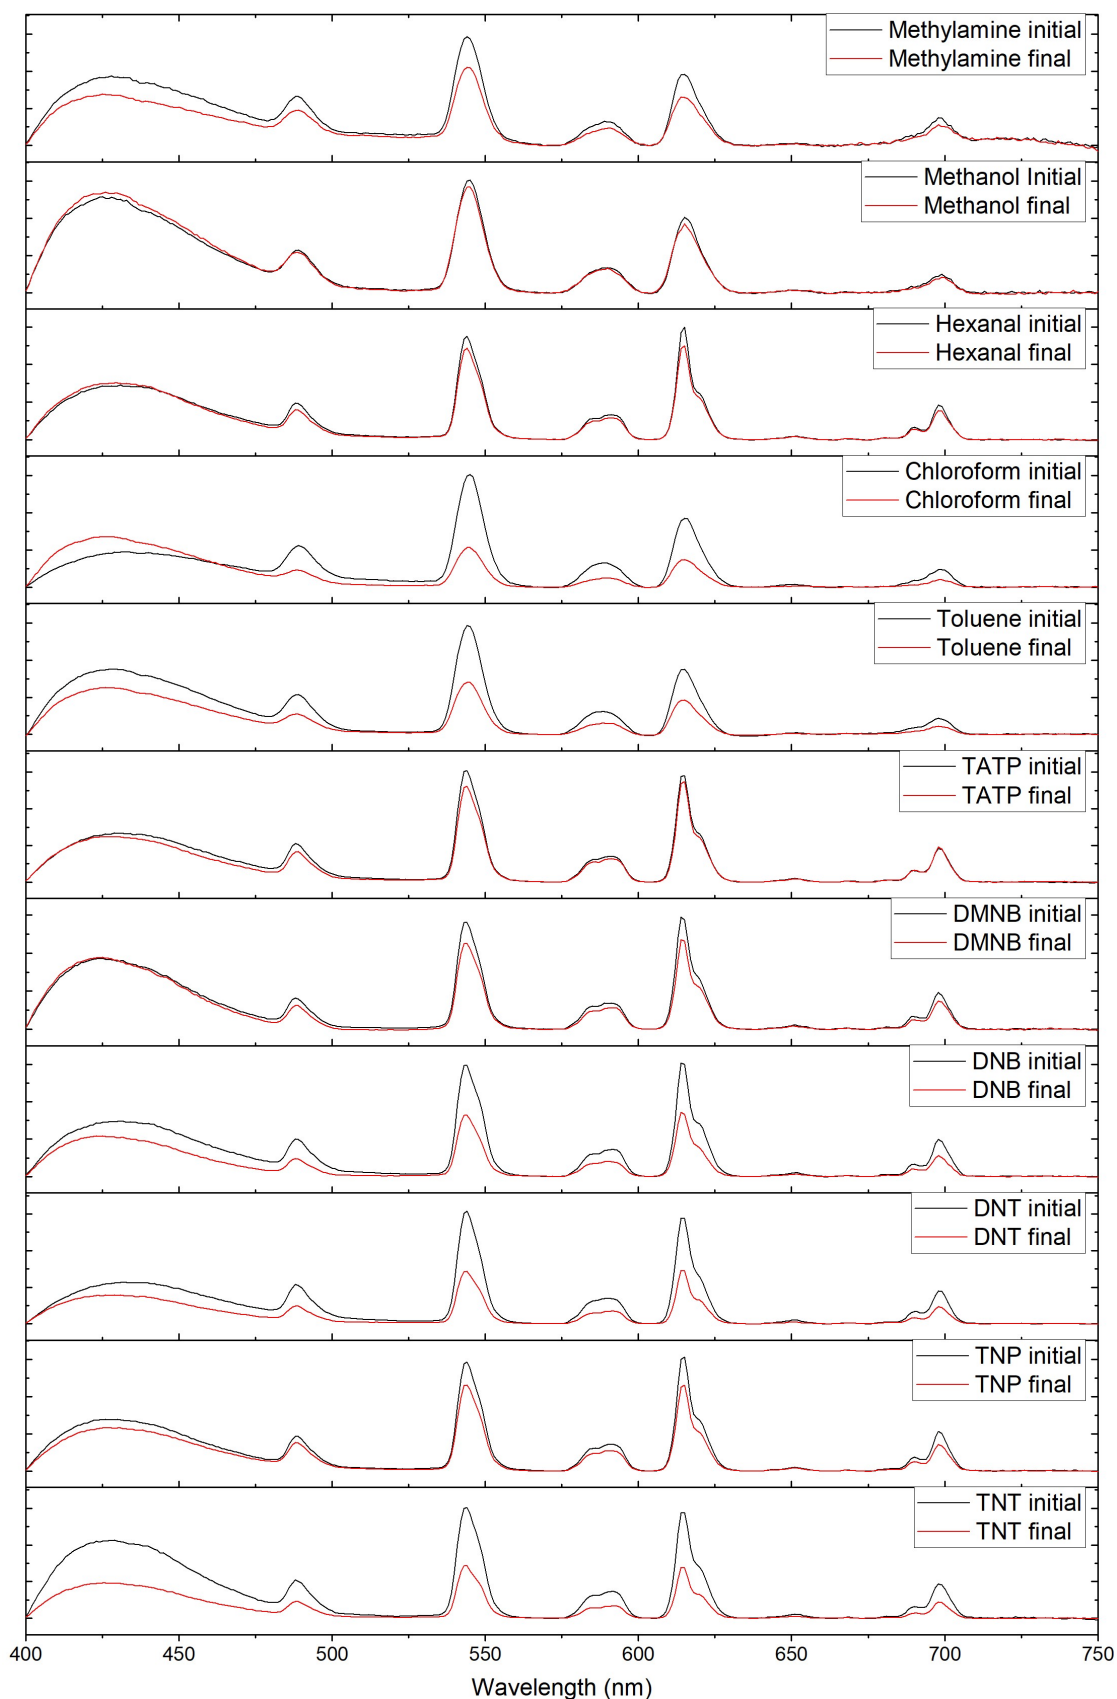

**Figure S31:** Photoluminescence emission spectra of  $\text{UCY-15}(\text{Y}_{87.5}\text{Eu}_5\text{Tb}_{7.5})\text{@PDMS}$  before (black line) and after (red line) 5 min exposure to saturated vapours of the selected analytes.

## References

1. S. Park, J. Lee, S. G. Cho, E. M. Goh, S. Lee, S.-S. Koh and J. Kim, Mass Spectrometric Analysis of Eight Common Chemical Explosives Using Ion Trap Mass Spectrometer, *Bull. Korean Chem. Soc.*, 2013, **34**, 3659.
2. G. R. Peterson, W. P. Bassett, B. L. Weeks and L. J. Hope-Weeks, Phase pure triacetone triperoxide: The influence of ionic strength, oxidant source, and acid catalyst, *Cryst. Growth Des.*, 2013, **13**, 2307.
3. J. P. Vizuet, M. L. Mortensen, A. L. Lewis, M. A. Wunch, H. R. Firouzi, G. T. McCandless and K. J. Balkus, Fluoro-Bridged Clusters in Rare-Earth Metal–Organic Frameworks, *J. Am. Chem. Soc.*, 2021, **143**, 17995.
4. K. O. Christe and W. W. Wilson, Nuclear magnetic resonance spectrum of the fluoride anion, *J. Fluor. Chem.*, 1990, **46**, 339.
5. W. He, F. Du, Y. Wu, Y. Wang, X. Liu, H. Liu and X. Zhao, Quantitative  $^{19}\text{F}$  NMR method validation and application to the quantitative analysis of a fluoro-polyphosphates mixture, *J. Fluor. Chem.*, 2006, **127**, 809.
6. L. Czepirski and J. JagieŁŁo, Virial-type thermal equation of gas—solid adsorption, *Chem. Eng. Sci.*, 1989, **44**, 797.
7. K. Sumida, D. L. Rogow, J. A. Mason, T. M. McDonald, E. D. Bloch, Z. R. Herm, T.-H. Bae and J. R. Long, Carbon Dioxide Capture in Metal–Organic Frameworks, *Chem. Rev.*, 2012, **112**, 724.
8. M. H. V Werts, R. T. F. Jukes and J. W. Verhoeven, The emission spectrum and the radiative lifetime of  $\text{Eu}^{3+}$  in luminescent lanthanide complexes, *Phys. Chem. Chem. Phys.*, 2002, **4**, 1542.
9. N. M. Shavaleev, S. V Eliseeva, R. Scopelliti and J.-C. G. Bünzli, N-Aryl Chromophore Ligands for Bright Europium Luminescence, *Inorg. Chem.*, 2010, **49**, 3927.
